# Supplementary material
Source: PubMed Central journal article supplement (PMC6855103)
Supplement: ba030981-suppl1.pdf [file ba030981-suppl1.pdf]

**Human models of NUP98-KDM5A megakaryocytic leukemia in mice  
contribute to uncovering new biomarkers and therapeutic  
vulnerabilities**

Sophie Cardin\*, Mélanie Bilodeau\*, Mathieu Roussy, Léo Aubert, Thomas Milan,  
Loubna Jouan, Alexandre Rouette, Louise Laramée, Patrick Gendron, Jean Duchaine,  
Hélène Decaluwe, Jean-François Spinella, Stéphanie Mourad, Françoise Couture, Daniel  
Sinnott, Élie Haddad, Josette-Renée Landry, Jing Ma, R. Keith Humphries, Philippe P.  
Roux, Josée Hébert, Tanja A. Gruber, Brian T. Wilhelm and Sonia Cellot

(\*Co-first authors)

**SUPPLEMENTAL DATA**

## SUPPLEMENTAL METHODS

### Lentiviral transduction

Cord blood-derived CD34<sup>+</sup> human hematopoietic stem/progenitor cells (e.g. CB-CD34<sup>+</sup> cells) were prestimulated for 16-20h in expansion media prior to lentiviral transduction in 96-well plates coated with RetroNectin (Takara Bio USA, Inc., cat. no. T100B). CB-CD34<sup>+</sup> cells (1-4 x10<sup>4</sup> cells per well) were transduced with lentiviral particles encoding *NUP98-KDM5A* or an empty vector at a multiplicity of infection (MOI) of  $\approx 50$  in expansion media supplemented with 1 $\mu$ g/ml polybrene (hexadimethrine bromide, MilliporeSigma, USA, cat. no. H9268), for 16 hours.

### Clonogenic progenitor cell assay

Transduced cells (unsorted) were seeded in Methocult H4034 optimum (Stem Cell Technologies Inc., cat. no. 04034) at a density of 200 cells/ml in 35 mm dishes. Colony quantification and morphological assessment were performed manually at day 14 post-seeding with an EVOS FL Auto imaging system (Thermo Fisher Scientific, cat. no. AMAFD1000).

### Xenotransplantation

NOD-*scid* IL2Rg<sup>null</sup> (NSG) mice from Jackson Laboratories (Bar Harbor, ME, USA) were used as primary recipients for xenotransplantation. NOD.Cg-Prkdc<sup>scid</sup> Il2rg<sup>tm1Wjl</sup> Tg(CMV-IL3,CSF2,KITLG)1Eav/MloySzJ mice (NSG-SGM3, Jackson Laboratories) were used as secondary recipients to enhance engraftment of AMKL primary xenograft cells. At day 6-7 of culture, unsorted transduced cells (approx. 8-10 x 10<sup>4</sup> or 70% of the well) were injected intravenously into a single

immunodeficient (NSG) recipient mouse sub-lethally irradiated (1 well/mouse, 3 to 28 mice/experiment, 6 independent experiments, 7 CB units). Primary AMKL xenograft cells ( $2.2 \times 10^6$  bulk cells) were injected in secondary NSG-SGM3 mice. All mouse recipients were sub-lethally irradiated (whole-body irradiation with 2Gy X-rays, CP160 irradiator, Faxitron X-Ray Corporation, USA) 6 to 24 hours prior to the xenotransplantation. Following xenotransplantation, the percentage of human CD45<sup>+</sup> cells in mouse bloodstream was monitored monthly by flow cytometry. Mice were maintained up to 64 weeks post-transplantation or until showing advanced signs of leukemia (reduced mobility, paleness, hunchback and/or dyspnea). Upon sacrifice, bone marrow (femurs, tibias and pelvic bones) and spleen cells were harvested in RPMI 1640 (Thermo Fisher Scientific, cat. no. 22400-089) supplemented with 1% FBS (Seradigm, cat.no. TXPLCA1400-500) and characterized by flow cytometry and histopathology. Approximately  $1-5 \times 10^5$  leukemic cells were either enriched by flow cytometry (infiltration  $\leq 85\%$ ) or directly lysed in Trizol (infiltration  $\geq 85\%$ ) for RNA extraction and sequencing. One tibia per mouse was fixed in 10% neutral buffered formalin for histopathology.

*NUP98* rearranged patient-derived xenograft (PDX) model was generated by intravenous injection of primary NUP98-BPTF AMKL cells collected at the stage of disease progression<sup>1</sup> and propagated by serial transplantation in NSG mice ( $600\ 000-2 \times 10^6$  cells per mouse).

### **Flow cytometry**

The staining buffer for flow cytometry was comprised of 2% FBS and 1mM EDTA (Thermo Fisher Scientific, cat. no. 15575-020) in PBS. Cell surface proteins were blocked for non-specific binding (mouse gamma globulin, dilution 1/1000, Jackson ImmunoResearch Laboratories, Inc., PA, USA, cat no.015-000-002), stained with directly conjugated primary antibodies listed in Table S4, and washed with staining

buffer according to standard procedures. Analytic flow cytometry was conducted with a LSRFortessa (BD Biosciences, USA) and a FACSCanto II (BD Biosciences) cytometers. Automated cell counting was performed with LSRFortessa cytometer equipped with a high throughput sampler (BD Biosciences), by recording the number of events in a fixed sample volume. Cells were sorted with a FACS Aria II flow cytometer (BD Biosciences), either at the flow cytometry platform of CHU Sainte-Justine or of the Institute for Research in Immunology and Cancer (Montreal, Canada).

### **Histopathology and microscopy**

Peripheral blood smears, cytospin preparations of bone marrow and spleen cells, and organ touch preparations (e.g. touch preps of spleen, kidney, lung, liver, lymph nodes) were stained with Giemsa according to standard protocols. Formalin-fixed tibias were decalcified prior to paraffin embedding. Four micron thick tissue sections were deparaffinised prior to hematoxylin phloxin saffron staining and mounted with permanent mounting media, according to standard procedures. Cytospin and touch prep imaging were conducted with an Axio-Imager Z1 microscope (Zeiss, Germany) equipped with a 63X objective (1.4 Plan-Apochromat DIC III, Zeiss) and a color camera (Canon 5DMKII), at the bioimaging platform of the Institute for Research in Immunology and Cancer (Montreal, Canada). Cytospin, touch prep and tibia section imaging were also conducted with a DM6 upright microscope (Leica Microsystems, Wetzlar, Germany) equipped with 10X (HC PL FLUOTAR 10x/0.32, Leica Microsystems), 63X (HC PL APO 63x/1.40-0.60 oil, Leica Microsystems) and 100X objectives and a color camera, at the Platform for Imaging by Microscopy of CHU Sainte-Justine.

## **Molecular studies**

### ***RNA sequencing and variant calling***

Quantification of total RNA was performed using a QuBit (Applied Biosystems, Thermo Fisher Scientific) and 500 ng of total RNA was used for Illumina sequencing library preparation. The quality of total RNA was assessed with the BioAnalyzer Nano (Agilent) and all samples had a RIN above 8 and sample purity was also assessed by Nanodrop using 260/280 and 260/230 ratios. Library preparation was done with the KAPA mRNAseq stranded kit (KAPA Biosystems, Thermo Fisher Scientific, Cat. no. KK8420) and quantified by QuBit and BioAnalyzer. All libraries were normalized and pooled to equimolar concentration by qPCR using the KAPA library quantification kit (KAPA Biosystems, Thermo Fisher Scientific, Cat. no. KK4973). Sequencing was performed on the Illumina HiSeq2000 or Nextseq500 with 200 and 150 cycles paired-end runs, respectively. Sequences were trimmed to remove sequencing adapters and low quality 3' bases using Trimmomatic version 0.35<sup>2</sup> and then aligned to the reference human genome version GRCh38 (gene annotation from Gencode version 26) using STAR version 2.5.1b<sup>3</sup>. Gene expression were estimated directly from STAR mapping as readcount values as well as computed using RSEM version 1.2.28<sup>4</sup> in order to obtain transcript level expression. Library preparation, sequencing, and data processing were performed at the Institute for Research in Immunology and Cancer's Genomics Platform (Montreal, Canada).

Variants were called using Freebayes (<https://arxiv.org/abs/1207.3907>) and then annotated using snpEff (<http://snpeff.sourceforge.net/>). Only mutations in regions that are covered at a 5X depth were kept. A list of 95 leukemia-related genes (see Table S6) was used to filter potential candidate variants relevant to the disease. Additional annotations related to the variants (coding or non-coding, alternative allele frequency

in public databases, *in silico* prediction on protein damage) was performed using the web interface wANNOVAR in order to prioritize variants<sup>5</sup>. Using these annotations, only rare and predicted damaging variations were retained.

Differential expression analysis was performed using the DESeq2 R package (version 1.16.1). Count tables were generated using HTSeq-count on BAM alignment files. Raw data count distributions were adjusted by regularised log transformation to generate heatmaps. Genes upregulated by at least two-fold in N5A AMKL samples (xenograft models and patients) compared to CB-CD34<sup>+</sup> cells were submitted to Gene Set Enrichment Analysis (GSEA) using annotated gene sets publicly available in the Molecular Signature Database (MSigDB)<sup>6,7</sup>. Distribution of selected gene expression values in bone marrow-derived human AML samples was generated with datasets extracted from the National Cancer Institute (NCI) TARGET database (<https://ocg.cancer.gov/programs/target/data-matrix>)<sup>8</sup>.

### **Validation Cohort – Gene expression data**

Annotated gene expression data used as validation cohort were generated from pediatric acute megakaryoblastic leukemia samples and analysed as described previously<sup>9</sup>. Briefly, Illumina paired-end sequencing reads were aligned to the GRCh37-lite genome build using an inhouse pipeline (StrongArm, unpublished). Transcript expression levels were estimated as Fragments Per Kilobase of transcript per Million mapped fragments (FPKM); gene FPKMs were computed by summing the transcript FPKMs for each gene using Cuffdiff2<sup>10</sup>. A gene was considered “expressed” if the FPKM value was  $\geq 0.35$  based on the distribution of FPKM values.

### **Enrichment analyses of CD3<sup>+</sup> GFP<sup>+</sup> cells**

Human CD3<sup>+</sup> cells were flow-sorted from 2 independent NUP98-KDM5A AMKL xenograft models and transcriptome analyses were performed as described. Genes overexpressed in CD3<sup>+</sup> cells as compared to the transcriptome of AMKL models (Fold Change  $\geq 5$ , mean FPKM  $\geq 10$  in CD3<sup>+</sup> cells; 725 GENES) were submitted to GO-term enrichment analyses using goseq (v1.34.1) and biomaRt (v2.38.0) packages.

### **PCA analyses from transcriptome**

Principal component analyses were performed using readcounts data from in-house and TARGET cohorts with the DESeq2 package<sup>11</sup>. Readcount data were fitted against a negative binomial distribution with the DESeq function, transformed using varianceStabilizingTransformation (VST) function and the output was used along with the plotPCA function to calculate principal components to be plotted. Data from figure 3B were left batch-uncorrected. For figures with both in-house and TARGET cohorts, batch corrections were performed using the *removeBatchEffect* function from the limma package (v3.38.3). Specifically, three batches were corrected: in-house data, TARGET-1 and TARGET-2 previously identified via a PCA analysis of uncorrected values.

### **Statistical Analyses – Figure 5B**

For each indicated gene, RPKM data from TARGET were compared between FAB categories using a Kruskal-Wallis test. Pairwise comparisons were performed using a Mann-Whitney rank sum test corrected by *Benjamini–Hochberg* for each pairwise comparisons.

### **Data visualization**

Visualizations were generated in the R statistical environment (v3.4.1 - 3.5.1) using the BPG (v5.9.1 – 5.9.6) and ggplot2 (v3.1.0) package along with Inkscape (v0.91) and Illustrator (vCS6).

### ***RT-PCR***

Reverse transcription was conducted with 10ng total RNA and the “High Capacity cDNA Reverse Transcription Kit” (Applied Biosystems, ThermoFisher Scientific, cat. no. 4368814) according to the manufacturer’s recommendations. cDNA products (2-3 ul) were amplified by PCR using primers specific to *N5A* breakpoint<sup>12</sup>, *NEO1*, and *KDM5B* (positive control) (Table S7) and with Taq DNA Polymerase (Thermo Fisher Scientific, cat. no. 18038042). PCR cycling conditions were as follow: 94°C 3min for 1 cycle; 95°C 45s, 60°C 30s, 72°C 60s for 40 cycles; 72°C 7min for 1 cycle, and 4°C holding.

### **ChIP-Seq**

Distribution of H3K4me3 and H3K27me3 histone modifications was determined by ChIP-Seq with chromatin extracts from two N5A cell lines or control CB-CD34<sup>+</sup> cells. Cells were crosslinked with formaldehyde 1% for 7 minutes at room temperature. Cross-linking was quenched with 0.125mM glycine (final concentration) for 5 minutes at room temperature. Fixed cells were washed with PBS, resuspended in 1 mL of a 1<sup>st</sup> lysis buffer (0.25% Triton, 10mM Tris pH 8.0, 10mM EDTA, 0.5mM EGTA, 1X protease inhibitor) for 5 minutes, and in 1 mL of a 2<sup>nd</sup> lysis buffer for 30 minutes (200mM NaCl, 10mM Tris pH 8.0, 1mM EDTA, 0.5mM EGTA, 1X protease inhibitor). The lysate was resuspended in the sonication buffer (0.5% SDS, 0.5% Triton, 10mM Tris pH 8.0, 140mM NaCl, 1mM EDTA, 0.5mM EGTA, 1X protease inhibitor), sonicated with a Covaris sonicator (Duty Factor 10%, 200 cycles per burst, 105W, 4 minutes) and centrifuged at 13000 rpm for 5 minutes. The supernatant was used for immunoprecipitation.



*Protein G Dynabeads*<sup>TM</sup> were resuspended in immunoprecipitation buffer (1% Triton, 10mM Tris pH 8.0, 150mM NaCl, 2mM EDTA) and incubated overnight on a rotator at 4°C with 3µg of antibodies recognizing a specific histone mark (anti-histone H3, Abcam, USA, cat no. ab1791; anti-histone H3K4me3, Abcam, cat.no. ab8580; anti-histone H3K27me3, MilliporeSigma, cat. no. 07-449). Sonicated chromatin was incubated with 250µL of beads during 4 hours on a rotator at 4°C. The beads were washed once in ‘Low Salt’ Buffer (0.5% NP40, 15mM KCl, 10mM Tris pH 8.0, 1mM EDTA), once in 3 different ‘High Salt’ buffers (0.5% Triton, 10mM Tris pH 8.0, 100mM (2) or 400mM (3) or 500mM (4) NaCl), twice in LiCl Buffer (0.5% NP40, 250mM LiCl, 10mM Tris pH 8.0, 1mM EDTA), and finally in TE. To perform the elution step, ChIPed material was incubated overnight at 65°C with shaking (1200rpm). To reverse crosslink and purify DNA, an RNase and proteinase K digestion was performed, and DNA was extracted by a classic phenol-chloroform protocol. TruSeq ChIP Library Preparation Kit (Illumina, cat. no. IP-202-9001) was used to construct DNA libraries. HiSeq 2000 was used to sequence samples (parameter: 100bp paired-end) according to Illumina protocols. Quality of the raw sequence data was checked by FastQC (version 0.11.4) and Trimmomatic (version 0.32). DNA fragments were mapped on *hg19* genome reference using BWA (version 0.7.10). PCR duplicates were removed by Samtools (version 1.2). EaSeq (version 1.04) was used to further analyze data.

### **Cell surface proteomic analysis**

Patient-derived xenotransplantation (PDX) of NUP98-BPTF bone marrow cells were produced in NSG mice. Harvested splenic megakaryoblastic cells of two secondary recipients were sorted on CD41-APC and pooled to perform cell surface proteomic analysis using a previously described procedure<sup>13</sup>. Proteins were then selected based on their detection in at least two replicates of the same biological condition, with a minimum of 2 unique peptides. These proteins were considered as identified with high-confidence. We

then manually sorted all identified proteins such that we kept those that contain at least one cell surface-exposed domain, which could be potentially biotinylated. To do so, we analyzed proteins identified with “high-confidence” by querying them against the UniProt online database (<http://www.uniprot.org/>). The final cell membrane protein list was compared to the “Hallmark gene set” using Metascape<sup>14,15</sup>.

### **Pharmacological inhibition assays**

Xenograft cells were maintained in optimised cultures conditions in a serum free media supplemented with cytokines, 500 nM SR1<sup>16</sup> (Cedarlane) and 750 nM UM729<sup>17</sup> (STEMCELL Technologies). CMK and ML-2 cells were maintained RPMI 1640 media supplemented with 20% fetal bovine serum (Wisent Inc.). M07e cells were maintained RPMI 1640 media supplemented with 10% fetal bovine serum and 10ng/ml human IL-3 (Gibco). Pharmacological inhibition assays were conducted by the High-Throughput Screening Core Facility from The Institute for Research in Immunology and Cancer (IRIC, Montreal). Dose-response curves (10 data points, 1nM to 10 $\mu$ M, 3 fold dilutions) were generated by seeding 1000-5000 cells in 384-well plate format in quadruplicate and read-out was conducted with Cell Titer Glo (Promega) after 6 days of incubation at 37°C/5% CO<sub>2</sub> with inhibitors or vehicle (0.1% DMSO). Percentage of viability was calculated as follow: 100 x (mean luminescence compound/mean luminescence DMSO vehicle). IC<sub>50</sub> concentrations were determined using a nonlinear regression analysis in GraphPad Prism version 7.03. Clofarabine (A10228), INCB018424 (ruxolitinib, A11041) and tofacitinib citrate (CP-690550) were purchased from AdooQ Bioscience.

## REFERENCES

- 1 Roussy, M. *et al.* NUP98-BPTF gene fusion identified in primary refractory acute megakaryoblastic leukemia of infancy. *Genes, chromosomes & cancer* **57**, 311-319, doi:10.1002/gcc.22532 (2018).
- 2 Bolger, A. M., Lohse, M. & Usadel, B. Trimmomatic: a flexible trimmer for Illumina sequence data. *Bioinformatics* **30**, 2114-2120, doi:10.1093/bioinformatics/btu170 (2014).
- 3 Dobin, A. *et al.* STAR: ultrafast universal RNA-seq aligner. *Bioinformatics* **29**, 15-21, doi:10.1093/bioinformatics/bts635 (2013).
- 4 Li, B. & Dewey, C. N. RSEM: accurate transcript quantification from RNA-Seq data with or without a reference genome. *BMC Bioinformatics* **12**, 323, doi:10.1186/1471-2105-12-323 (2011).
- 5 Yang, H. & Wang, K. Genomic variant annotation and prioritization with ANNOVAR and wANNOVAR. *Nat Protoc* **10**, 1556-1566, doi:10.1038/nprot.2015.105 (2015).
- 6 Subramanian, A. *et al.* Gene set enrichment analysis: a knowledge-based approach for interpreting genome-wide expression profiles. *Proc Natl Acad Sci U S A* **102**, 15545-15550, doi:10.1073/pnas.0506580102 (2005).
- 7 Mootha, V. K. *et al.* PGC-1alpha-responsive genes involved in oxidative phosphorylation are coordinately downregulated in human diabetes. *Nat Genet* **34**, 267-273, doi:10.1038/ng1180 (2003).
- 8 Bolouri, H. *et al.* The molecular landscape of pediatric acute myeloid leukemia reveals recurrent structural alterations and age-specific mutational interactions. *Nat Med* **24**, 103-112, doi:10.1038/nm.4439 (2018).

- 9 de Rooij, J. D. *et al.* Pediatric non-Down syndrome acute megakaryoblastic leukemia is characterized by distinct genomic subsets with varying outcomes. *Nat Genet* **49**, 451-456, doi:10.1038/ng.3772 (2017).
- 10 Trapnell, C. *et al.* Differential analysis of gene regulation at transcript resolution with RNA-seq. *Nat Biotechnol* **31**, 46-53, doi:10.1038/nbt.2450 (2013).
- 11 Love, M. I., Huber, W. & Anders, S. Moderated estimation of fold change and dispersion for RNA-seq data with DESeq2. *Genome Biol* **15**, 550, doi:10.1186/s13059-014-0550-8 (2014).
- 12 Gruber, T. A. *et al.* An Inv(16)(p13.3q24.3)-encoded CBFA2T3-GLIS2 fusion protein defines an aggressive subtype of pediatric acute megakaryoblastic leukemia. *Cancer Cell* **22**, 683-697, doi:10.1016/j.ccr.2012.10.007 (2012).
- 13 Goyette, M. A. *et al.* The Receptor Tyrosine Kinase AXL Is Required at Multiple Steps of the Metastatic Cascade during HER2-Positive Breast Cancer Progression. *Cell Rep* **23**, 1476-1490, doi:10.1016/j.celrep.2018.04.019 (2018).
- 14 Zhou, Y. *et al.* Metascape provides a biologist-oriented resource for the analysis of systems-level datasets. *Nature Communications* **10**, 1523, doi:10.1038/s41467-019-09234-6 (2019).
- 15 Liberzon, A. *et al.* The Molecular Signatures Database (MSigDB) hallmark gene set collection. *Cell Syst* **1**, 417-425, doi:10.1016/j.cels.2015.12.004 (2015).
- 16 Boitano, A. E. *et al.* Aryl hydrocarbon receptor antagonists promote the expansion of human hematopoietic stem cells. *Science (New York, N.Y.)* **329**, 1345-1348, doi:10.1126/science.1191536 (2010).
- 17 Pabst, C. *et al.* Identification of small molecules that support human leukemia stem cell activity ex vivo. *Nat Methods* **11**, 436-442, doi:10.1038/nmeth.2847 (2014).

**Table S1. Characteristics of bone marrow-derived AML samples from pediatric patients.**

| Patient sample ID     | Age at presentation | Immunophenotype                                                                       | Karyotype                                                                                                                                                                    | Genetic Alteration                                             | Percentage of blasts (%) | Clinical presentation                                                                                                                |
|-----------------------|---------------------|---------------------------------------------------------------------------------------|------------------------------------------------------------------------------------------------------------------------------------------------------------------------------|----------------------------------------------------------------|--------------------------|--------------------------------------------------------------------------------------------------------------------------------------|
| pAMKL-1               | 17 months           | CD45 <sup>dim</sup> , CD34 -, CD33+, CD41+, CD42b+, CD61+, CD71+, HLA-DR+, CD4+, MPO- | 48,XY,t(6;13)(p21;q14),+der(6)t(6;13),+21[25]                                                                                                                                | <i>NUP98-KDM5A</i> <sup>a</sup>                                | 50.6                     | Bruising, epistaxis, pancytopenia, CNS 1                                                                                             |
| pAMKL-2               | 30 months           | CD45 <sup>dim</sup> , CD34-, CD33+, CD41+, CD42b+, CD61+, CD71+, CD117-               | 49,XX,t(1;12)(p32;p13),+4,+del(6)(q21q23),del(13)(q12q22),+21[19]/46,XX,t(1;12)(p32;p13),der(19)t(19;21)(q13;q21),add(21)(q11)t(13)/46,XX[42]                                | <i>NUP98-KDM5A</i> <sup>a</sup>                                | 60                       | Fatigue, pallor, anorexia, bruising, splenomegaly, pancytopenia, CNS 1                                                               |
| pAMKL-3D <sup>b</sup> | 8 months            | CD45 <sup>dim</sup> , CD34-, CD33-, CD42b+, MPO-, CD117-, TdT-, CD19-, CD10-, CD3-    | 47,XY,+6,t(11;17)(p15;q23)[7]/48,idem,+19[2]/49,idem,+7,+19[9]/46,XY[2],ish t(11;17)(5NUP98+;3NUP98+)[4]                                                                     | <i>NUP98-BPTF</i> <sup>a</sup>                                 | N/A                      | Bruising, petechiae, conjunctival hemorrhage, mild hepatosplenomegaly, pancytopenia, CNS 1                                           |
| pAMKL-3P <sup>b</sup> | 13 months           | CD45 <sup>dim</sup> , CD34-, CD41+, CD61+                                             | 49,XY,+6,+7,t(11;17)(p15;q23),+19[25] (initial progression)<br>49,XY,+6,+7,t(11;17)(p15;q23),+19 [20]/49, idem,t(7;14)[3]/49, idem,t(3;4),t(10;21)[2] (uncontrolled disease) | <i>NUP98-BPTF</i> <sup>a</sup>                                 | N/A                      | N/A                                                                                                                                  |
| pAMKL-4               | 2 years             | CD45-, CD34+, CD41+, CD42b+, CD61+, CD117+, PAS+, TdT-                                | 46,XY,t(1;16)(q21;p11.2),ish t(1;16)                                                                                                                                         | <i>CBFA2T3-GLIS2</i> <sup>a</sup>                              | 93                       | Fatigue, recurrent fever, anorexia, anemia and thrombocytopenia, CNS 1                                                               |
| pAMKL-5               | 18 months           | CD34-, CD41+, CD61+, CD42b+                                                           | N/A (referred case)                                                                                                                                                          | <i>RMB15-MKL1</i> <sup>a</sup>                                 | 49                       | Bony pain, anemia, thrombocytopenia, CNS 2                                                                                           |
| pAML-6                | 16 years            | CD45 <sup>dim</sup> , CD34+, CD33+, CD13+, CD11a+, CD117+, CD123+, HLA-DR+            | 46, XX                                                                                                                                                                       | <i>NUP98-NSD1</i> <sup>a</sup><br><i>FLT3 ITD</i> <sup>c</sup> | 48.8% in PB              | Fatigue, diffuse adenopathy, fever, night sweats, headache, respiratory distress, hyperleukocytosis, anemia, thrombocytopenia, CNS 2 |

<sup>a</sup> Fusion genes were identified by RNA sequencing. <sup>b</sup> pAMKL-3D and pAMKL-3P, diagnostic and disease progression sample, respectively (Roussy et al, *Genes Chromosomes Cancer*, 2018). <sup>c</sup> *FLT3* status identified by targeted PCR. AML, acute myeloid leukemia; AMKL, acute megakaryoblastic leukemia; N/A, not available; CNS, central nervous system infiltration.

| Table S2. Frequency of leukemia subtypes in <i>NUP98-KDM5A</i> human xenograft models.                                                                                                                                                                                             |                             |             |             |
|------------------------------------------------------------------------------------------------------------------------------------------------------------------------------------------------------------------------------------------------------------------------------------|-----------------------------|-------------|-------------|
|                                                                                                                                                                                                                                                                                    |                             | CTL         | N5A         |
| <b>EXP1</b><br>( <i>ctl</i> <i>n</i> =3; <i>N5A</i> <i>n</i> =3)                                                                                                                                                                                                                   | AMKL                        | 0           | 1           |
|                                                                                                                                                                                                                                                                                    | AML-O                       | 0           | 0           |
|                                                                                                                                                                                                                                                                                    | B-ALL                       | 0           | 1           |
|                                                                                                                                                                                                                                                                                    | T-ALL                       | 0           | 0           |
|                                                                                                                                                                                                                                                                                    | Death unrelated to leukemia | 3           | 1           |
|                                                                                                                                                                                                                                                                                    | <b>Total leukemia λ</b>     | <b>0/3</b>  | <b>2/3</b>  |
| <b>EXP2</b><br>( <i>ctl</i> <i>n</i> =4; <i>N5A</i> <i>n</i> =12)                                                                                                                                                                                                                  | AMKL                        | 0           | 1           |
|                                                                                                                                                                                                                                                                                    | AML-O                       | 0           | 0           |
|                                                                                                                                                                                                                                                                                    | B-ALL                       | 0           | 2           |
|                                                                                                                                                                                                                                                                                    | T-ALL                       | 0           | 0           |
|                                                                                                                                                                                                                                                                                    | Death unrelated to leukemia | 4           | 9           |
|                                                                                                                                                                                                                                                                                    | <b>Total leukemia λ</b>     | <b>0/4</b>  | <b>3/12</b> |
| <b>EXP3</b><br>( <i>ctl</i> <i>n</i> =3; <i>N5A</i> <i>n</i> =9)                                                                                                                                                                                                                   | AMKL                        | 0           | 0           |
|                                                                                                                                                                                                                                                                                    | AML-O                       | 0           | 1           |
|                                                                                                                                                                                                                                                                                    | B-ALL                       | 0           | 0           |
|                                                                                                                                                                                                                                                                                    | T-ALL                       | 0           | 1           |
|                                                                                                                                                                                                                                                                                    | Death unrelated to leukemia | 3           | 7           |
|                                                                                                                                                                                                                                                                                    | <b>Total leukemia λ</b>     | <b>0/3</b>  | <b>2/9</b>  |
| <b>EXP4</b><br>( <i>ctl</i> <i>n</i> =6; <i>N5A</i> <i>n</i> =8)                                                                                                                                                                                                                   | AMKL                        | 0           | 2           |
|                                                                                                                                                                                                                                                                                    | AML-O                       | 0           | 0           |
|                                                                                                                                                                                                                                                                                    | B-ALL                       | 0           | 3           |
|                                                                                                                                                                                                                                                                                    | T-ALL                       | 0           | 0           |
|                                                                                                                                                                                                                                                                                    | Death unrelated to leukemia | 6           | 3           |
|                                                                                                                                                                                                                                                                                    | <b>Total leukemia λ</b>     | <b>0/6</b>  | <b>5/8</b>  |
| <b>EXP5</b><br>( <i>ctl</i> <i>n</i> =2; <i>N5A</i> <i>n</i> =9)                                                                                                                                                                                                                   | AMKL                        | 0           | 1           |
|                                                                                                                                                                                                                                                                                    | AML-O                       | 0           | 4           |
|                                                                                                                                                                                                                                                                                    | B-ALL                       | 0           | 1           |
|                                                                                                                                                                                                                                                                                    | T-ALL                       | 0           | 0           |
|                                                                                                                                                                                                                                                                                    | Death unrelated to leukemia | 2           | 3           |
|                                                                                                                                                                                                                                                                                    | <b>Total leukemia λ</b>     | <b>0/2</b>  | <b>6/9</b>  |
| <b>EXP6</b><br>( <i>ctl</i> <i>n</i> =12; <i>N5A</i> <i>n</i> =28)                                                                                                                                                                                                                 | AMKL                        | 0           | 1           |
|                                                                                                                                                                                                                                                                                    | AML-O                       | 0           | 6           |
|                                                                                                                                                                                                                                                                                    | B-ALL                       | 0           | 0           |
|                                                                                                                                                                                                                                                                                    | T-ALL                       | 0           | 0           |
|                                                                                                                                                                                                                                                                                    | Death unrelated to leukemia | 12          | 21          |
|                                                                                                                                                                                                                                                                                    | <b>Total leukemia λ</b>     | <b>0/12</b> | <b>7/28</b> |
| EXP, experiment; transplanted cells transduced with <i>ctl</i> (control) or <i>N5A</i> ( <i>NUP98-KDM5A</i> ) vector; AMKL, acute megakaryoblastic leukemia; AML-O, acute myeloid leukemia other (non-AMKL); B- or T-ALL, B- or T-cell acute lymphoblastic leukemia; λ, frequency. |                             |             |             |

| Table S3. Characteristics of leukemias in primary NUP98-KDM5A xenograft recipients. |                 |             |               |               |                                        |                 |                    |                                   |                                                                                                                                                                                            |
|-------------------------------------------------------------------------------------|-----------------|-------------|---------------|---------------|----------------------------------------|-----------------|--------------------|-----------------------------------|--------------------------------------------------------------------------------------------------------------------------------------------------------------------------------------------|
| Leukemia subtype                                                                    | Xenograft ID    | Mouse ID    | Latency (wks) | Brittle bones | Blasts infiltration in Bone Marrow (%) | Splenomegaly    | Spleen weight (mg) | Blasts infiltration in Spleen (%) | Blast Immunophenotype                                                                                                                                                                      |
| <b>AMKL</b>                                                                         |                 |             |               |               |                                        |                 |                    |                                   |                                                                                                                                                                                            |
|                                                                                     | <b>xAMKL-1</b>  | <b>C362</b> | <b>34</b>     | <b>yes</b>    | <b>31,9</b>                            | <b>Mild</b>     | <b>N/A</b>         | <b>0,1</b>                        | <b>hCD45<sup>low</sup>GFP<sup>+</sup>CD34<sup>+</sup>CD61<sup>+</sup></b>                                                                                                                  |
|                                                                                     | <b>xAMKL-2</b>  | <b>D922</b> | <b>37</b>     | <b>yes</b>    | <b>15,9</b>                            | <b>Mild</b>     | <b>N/A</b>         | <b>0,8</b>                        | <b>hCD45<sup>low</sup>GFP<sup>+</sup>CD34<sup>+</sup>CD41<sup>+</sup>CD61<sup>+</sup></b>                                                                                                  |
|                                                                                     | <b>xAMKL-3</b>  | <b>E745</b> | <b>48</b>     | <b>yes</b>    | <b>34,7</b>                            | <b>Mild</b>     | <b>76</b>          | <b>0,34</b>                       | <b>hCD45<sup>low</sup>GFP<sup>+</sup>CD34<sup>+</sup>CD41<sup>+</sup>CD61<sup>+</sup></b>                                                                                                  |
|                                                                                     | xAMKL-4         | E771        | 63            | yes           | 55,2                                   | Mild            | 76                 | 3,5                               | hCD45 <sup>low</sup> GFP <sup>+</sup> CD34 <sup>+</sup> CD41 <sup>+</sup> CD61 <sup>+</sup>                                                                                                |
|                                                                                     | <b>xAMKL-5</b>  | <b>E890</b> | <b>71</b>     | <b>yes</b>    | <b>37,1</b>                            | <b>Mild</b>     | <b>69</b>          | <b>N/A</b>                        | <b>hCD45<sup>low</sup>GFP<sup>+</sup>CD34<sup>+</sup>CD41<sup>+</sup>CD61<sup>+</sup></b>                                                                                                  |
|                                                                                     | xAMKL-6 *       | F821        | 46            | partially     | 5,3<br>5,4                             | Severe          | 330                | 1,4<br>47,1                       | hCD45 <sup>low</sup> GFP <sup>+</sup> CD34 <sup>+</sup> CD41 <sup>+</sup> CD36 <sup>+</sup> /<br>hCD45 <sup>+</sup> GFP <sup>+</sup> CD34 <sup>+</sup> CD41 <sup>+</sup> CD36 <sup>+</sup> |
| <b>AML-O</b>                                                                        |                 |             |               |               |                                        |                 |                    |                                   |                                                                                                                                                                                            |
|                                                                                     | <b>xAML-O-1</b> | <b>E385</b> | <b>40</b>     | <b>yes</b>    | <b>77,3</b>                            | <b>Mild</b>     | <b>70</b>          | <b>43,2</b>                       | <b>hCD45<sup>+</sup>GFP<sup>+</sup>CD34<sup>+</sup>CD33<sup>+</sup>CD41<sup>+</sup>CD61<sup>+</sup>CD117<sup>+</sup>CD36<sup>+</sup></b>                                                   |
|                                                                                     | <b>xAML-O-2</b> | <b>E737</b> | <b>32</b>     | <b>yes</b>    | <b>95,3</b>                            | <b>Moderate</b> | <b>273</b>         | <b>46,3</b>                       | <b>hCD45<sup>+</sup>GFP<sup>+</sup>CD34<sup>+</sup>CD61<sup>+</sup>CD71<sup>+/+</sup>CD117<sup>+/+</sup>CD36<sup>+</sup></b>                                                               |
|                                                                                     | <b>xAML-O-3</b> | <b>F823</b> | <b>34</b>     | <b>yes</b>    | <b>89,1</b>                            | <b>Severe</b>   | <b>342</b>         | <b>77,6</b>                       | <b>hCD45<sup>+</sup>GFP<sup>+</sup>CD34<sup>+</sup>CD33<sup>+/+</sup>CD41<sup>+</sup>CD71<sup>+/+</sup>CD117<sup>+/+</sup>CD36<sup>+</sup></b>                                             |
|                                                                                     | xAML-O-4        | E892        | 64            | yes           | 52,5                                   | Mild            | 64                 | 0,48                              | hCD45 <sup>low/+</sup> GFP <sup>+</sup> CD34 <sup>+</sup> CD41 <sup>+</sup> CD36 <sup>+</sup>                                                                                              |
|                                                                                     | xAML-O-5        | E884        | 56            | yes           | 55,3                                   | Severe          | 531                | 23                                | hCD45 <sup>+</sup> GFP <sup>+</sup> CD34 <sup>+</sup> CD61 <sup>+</sup> CD117 <sup>+</sup> CD36 <sup>+</sup>                                                                               |
|                                                                                     | xAML-O-6        | E891        | 67            | yes           | 62,2                                   | Moderate        | 176                | 10,8                              | hCD45 <sup>+</sup> GFP <sup>+</sup> CD34 <sup>+</sup> CD33 <sup>+</sup> CD117 <sup>+</sup> CD36 <sup>+</sup>                                                                               |
|                                                                                     | xAML-O-7        | F827        | 46            | yes           | 19,7                                   | Severe          | 630                | 21,2                              | hCD45 <sup>+</sup> GFP <sup>+</sup> CD34 <sup>+</sup> CD33 <sup>+</sup> CD41 <sup>+</sup> CD36 <sup>+</sup>                                                                                |
|                                                                                     | xAML-O-8        | E857        | 67            | yes           | 30,6                                   | Mild            | 61                 | 1,07                              | hCD45 <sup>+</sup> GFP <sup>+</sup> CD34 <sup>+</sup> CD41 <sup>+</sup> CD33 <sup>+</sup> CD117 <sup>+</sup> CD36 <sup>+</sup>                                                             |
|                                                                                     | xAML-O-9        | F788        | 27            | yes           | 72,2                                   | Moderate        | 261                | 90,4                              | hCD45 <sup>+</sup> GFP <sup>+</sup> CD34 <sup>+</sup> CD61 <sup>+</sup> CD117 <sup>+/+</sup> CD36 <sup>+</sup>                                                                             |
|                                                                                     | xAML-O-10       | F832        | 27            | yes           | 54,3                                   | no              | 32                 | 10,5                              | hCD45 <sup>+</sup> GFP <sup>+</sup> CD34 <sup>+</sup> CD61 <sup>+</sup> CD71 <sup>+</sup> CD117 <sup>+/+</sup> CD36 <sup>+</sup>                                                           |
|                                                                                     | xAML-O-11       | F802        | 34            | yes           | 27,6                                   | Mild            | 109                | 37,1                              | hCD45 <sup>+</sup> GFP <sup>+</sup> CD34 <sup>+</sup> CD33 <sup>+</sup> CD41 <sup>+</sup> CD71 <sup>+</sup> CD117 <sup>+/+</sup> CD36 <sup>+</sup>                                         |
| <b>B-ALL</b>                                                                        |                 |             |               |               |                                        |                 |                    |                                   |                                                                                                                                                                                            |
|                                                                                     | <b>xB-ALL-1</b> | <b>C384</b> | <b>50</b>     | <b>yes</b>    | <b>95,2</b>                            | <b>Severe</b>   | <b>N/A</b>         | <b>91,2</b>                       | <b>hCD45<sup>+</sup>GFP<sup>+</sup>CD19<sup>+</sup>CD10<sup>+</sup>CD20<sup>+</sup>CD38<sup>+</sup>CD34<sup>+/+</sup></b>                                                                  |
|                                                                                     | <b>xB-ALL-2</b> | <b>D918</b> | <b>37</b>     | <b>yes</b>    | <b>93,4</b>                            | <b>Severe</b>   | <b>N/A</b>         | <b>49,7</b>                       | <b>hCD45<sup>+</sup>GFP<sup>+</sup>CD19<sup>+</sup>CD10<sup>+</sup>CD20<sup>+</sup>CD38<sup>+</sup>CD34<sup>+/+</sup></b>                                                                  |
|                                                                                     | <b>xB-ALL-3</b> | <b>D917</b> | <b>40</b>     | <b>yes</b>    | <b>31,6</b>                            | <b>Severe</b>   | <b>N/A</b>         | <b>59,9</b>                       | <b>hCD45<sup>+</sup>GFP<sup>+</sup>CD19<sup>+</sup>CD10<sup>+</sup>CD20<sup>+</sup>CD38<sup>+</sup>CD34<sup>+/+</sup></b>                                                                  |
|                                                                                     | <b>xB-ALL-4</b> | <b>E755</b> | <b>39</b>     | <b>yes</b>    | <b>77,3</b>                            | <b>Severe</b>   | <b>762</b>         | <b>76,8</b>                       | <b>hCD45<sup>+</sup>GFP<sup>+</sup>CD19<sup>+</sup>CD34<sup>+/+</sup></b>                                                                                                                  |
|                                                                                     | xB-ALL-5        | E742        | 59            | yes           | 87,1                                   | Severe          | 794                | 82,0                              | hCD45 <sup>+</sup> GFP <sup>+</sup> CD19 <sup>+</sup> CD34 <sup>+/+</sup>                                                                                                                  |
|                                                                                     | xB-ALL-6        | E743        | 59            | yes           | 99,8                                   | Moderate        | 205                | 99,7                              | hCD45 <sup>+</sup> GFP <sup>+</sup> CD19 <sup>+</sup> CD34 <sup>+/+</sup>                                                                                                                  |
|                                                                                     | xB-ALL-7        | E854        | 67            | partially     | 16,8                                   | Severe          | 310                | 1,2                               | hCD45 <sup>+</sup> GFP <sup>+</sup> CD19 <sup>+</sup> CD34 <sup>+/+</sup>                                                                                                                  |
| <b>T-ALL</b>                                                                        |                 |             |               |               |                                        |                 |                    |                                   |                                                                                                                                                                                            |
|                                                                                     | xT-ALL-1        | E389        | 61            | yes           | 61,6                                   | Severe          | 601                | 29,8                              | hCD45 <sup>+</sup> GFP <sup>+</sup> CD3 <sup>+</sup> CD4 <sup>+</sup> CD8 <sup>+</sup> HLA-DR <sup>+</sup>                                                                                 |

AMKL, acute megakaryoblastic leukemia; AML-O, acute myeloid leukemia others (non-AMKL); B- or T-ALL, B- or T-cell acute lymphoblastic leukemia; wks, weeks; N/A, not available. \*For sample AMKL-6, 2 blast populations were detected. Samples in bold characters were used for RNA sequencing.

**Table S4. Primary antibody list.**

| Target Protein       | Conjugation | Host, isotype, clone                | Company                                 | Cat. No.      | Dilution for FACS |
|----------------------|-------------|-------------------------------------|-----------------------------------------|---------------|-------------------|
| CD3                  | APC         | Mouse IgG2a, κ, clone HIT3a         | Biolegend                               | 300312        | 3.0 : 100         |
| CD4                  | PE-Cy7      | Rat IgG2b, κ, clone A161A1          | Biolegend                               | 357409        | 2.0 : 100         |
| CD7                  | PE          | Mouse BALB/c IgG1, κ, clone M-T701  | BD Biosciences                          | 340581        | 2.0 : 100         |
| CD8                  | PerCP       | Mouse IgG1, κ, clone SK1            | Biolegend                               | 344707        | 3.5 : 100         |
| CD10/MME             | BV421       | Mouse (BALB/c) IgG1, κ, clone HI10a | BD Biosciences                          | 562902        | 4.0 : 100         |
| CD15                 | BV421       | Mouse IgG1, κ, clone W6D3           | Biolegend                               | 323039/323040 | 2.5 : 100         |
| CD19                 | APC         | Mouse IgG1, κ, clone HIB19          | BD Pharmingen                           | 555415        | 2.5 : 100         |
| CD19                 | BV421       | Mouse IgG1, κ, clone HIB19          | Biolegend                               | 302234        | 3.0 : 100         |
| CD19                 | PE          | Mouse IgG1, κ, clone HIB19          | Biolegend                               | 302208        | 2.0 : 100         |
| CD20                 | PerCP-Cy5.5 | Mouse IgG2b, κ, clone 2H7           | Biolegend                               | 302326        | 2.5 : 100         |
| CD33                 | PE-Cy7      | Mouse IgG1, κ, clone WM-53          | ThermoFisher Scientific<br>/eBioscience | 25-0338-42    | 1.5 : 100         |
| CD34                 | APC         | Mouse IgG1, κ, clone 581            | BD Biosciences                          | 555824        | 3.0 : 100         |
| CD34                 | BV421       | Mouse IgG1, κ, clone 581            | BD Biosciences                          | 562577        | 3.0 : 100         |
| CD34                 | PE          | Mouse IgG1, κ, clone 8G12           | BD Biosciences                          | 348057        | 2.0 : 100         |
| CD36                 | APC         | Mouse IgG2a, κ, clone 5-271         | Biolegend                               | 336208        | 1.25 : 100        |
| CD36                 | PE          | Mouse IgG2a, κ, clone 5-271         | Biolegend                               | 336206        | 2.0 : 100         |
| CD38                 | PE-Cy7      | Mouse IgG1, κ, clone HIT2           | ThermoFisher Scientific<br>/eBioscience | 25-0389-42    | 1.2 : 100         |
| CD41/ITGA2B          | APC         | Mouse IgG1, κ, clone H1P8           | Biolegend                               | 303710        | 3.0 : 100         |
| CD41/ITGA2B          | APC-Cy7     | Mouse IgG1, κ, clone H1P8           | Biolegend                               | 303716        | 2.0 : 100         |
| CD45/PTPRC           | APC-Cy7     | Mouse IgG1, κ, clone HI30           | Biolegend                               | 304014        | 3.5 : 100         |
| CD45/PTPRC           | PerCP       | Mouse IgG1, κ, clone HI30           | Biolegend                               | 304026        | 4.0 : 100         |
| CD45/PTPRC           | PE          | Rat IgG2b, κ, clone 30-F11          | Biolegend                               | 103106        | 0.1 : 100         |
| CD61/ITGB3           | PerCP-Cy5.5 | Mouse IgG1, κ, clone VI-PL2         | BD Biosciences                          | 564173        | 3.0 : 100         |
| CD62P/SELP           | PE-Cy7      | Mouse IgG1, κ, clone AK4            | Biolegend                               | 304922        | 2.0 : 100         |
| CD71                 | PE-Cy7      | Mouse IgG2a, κ, clone CY1G4         | Biolegend                               | 334112        | 2.0 : 100         |
| CD117/KIT            | PE          | Mouse IgG1, κ, clone 104D2          | ThermoFisher Scientific<br>/eBioscience | 12-1178-42    | 2.0 : 100         |
| CD235a/Glycophorin-A | PE-Cy7      | Mouse IgG2b, κ, clone GA-R2, HIR2   | BD Biosciences                          | 563666        | 1.25 : 100        |
| HLA-DR               | PE          | Mouse BALB/c IgG2a, κ, clone L243   | BD Biosciences                          | 347367        | 2.0 : 100         |



**Table S5. Descriptive list of RNAseq samples.**

| Sample ID                                 | Fusion gene          | Sample description                                     | GEO dataset (GSE123485) ID |
|-------------------------------------------|----------------------|--------------------------------------------------------|----------------------------|
| <b>Patients_AMKL</b>                      |                      |                                                        |                            |
| pAMKL-1                                   | <i>NUP98-KDM5A</i>   | BM <sup>b</sup>                                        | pAMKL-1_12H093             |
| pAMKL-2                                   | <i>NUP98-KDM5A</i>   | BM <sup>b</sup>                                        | pAMKL-2_14H014             |
| pAMKL-3D (diagnostic) <sup>a</sup>        | <i>NUP98-BPTF</i>    | BM <sup>b</sup>                                        | pAMKL-3D                   |
| pAMKL-3P (progression) <sup>a</sup>       | <i>NUP98-BPTF</i>    | BM <sup>b</sup>                                        | pAMKL-3P_BM_019            |
| pAMKL-4                                   | <i>CBFA2T3-GLIS2</i> | BM <sup>b</sup>                                        | pAMKL-4_15H014             |
| pAMKL-5                                   | <i>RMB15-MKL1</i>    | BM <sup>b</sup>                                        | pAMKL-5_BM_007             |
| <b>Patient_AML</b>                        |                      |                                                        |                            |
| pAML-6                                    | <i>NUP98-NSD1</i>    | BM <sup>b</sup>                                        | pAML-6_BM_005              |
| <b>Xenograft_AMKL</b>                     |                      |                                                        |                            |
| xAMKL-1                                   | <i>NUP98-KDM5A</i>   | FACS sorted CD3 <sup>+</sup> GFP <sup>+</sup> BM cells | xAMKL-1_C362               |
| xAMKL-2                                   | <i>NUP98-KDM5A</i>   | FACS sorted CD3 <sup>+</sup> GFP <sup>+</sup> BM cells | xAMKL-2_D922               |
| xAMKL-3                                   | <i>NUP98-KDM5A</i>   | FACS sorted CD3 <sup>+</sup> GFP <sup>+</sup> BM cells | xAMKL-3_E745               |
| xAMKL-5                                   | <i>NUP98-KDM5A</i>   | FACS sorted GFP <sup>+</sup> BM cells                  | xAMKL-5_E890               |
| <b>Xenograft_AMKL-associated T-cells</b>  |                      |                                                        |                            |
| xAMKL-1_associated CD3 <sup>+</sup> Cells | N/A                  | FACS sorted CD3 <sup>+</sup> BM cells                  | xAMKL-1_C362_CD3           |
| xAMKL-2_associated CD3 <sup>+</sup> Cells | N/A                  | FACS sorted CD3 <sup>+</sup> BM cells                  | xAMKL-2_D922_CD3           |
| <b>Xenograft_AML-O</b>                    |                      |                                                        |                            |
| xAML-O-1                                  | <i>NUP98-KDM5A</i>   | BM <sup>b</sup>                                        | xAML-1_E385                |
| xAML-O-2                                  | <i>NUP98-KDM5A</i>   | BM <sup>b</sup>                                        | xAML-2_F737                |
| xAML-O-3                                  | <i>NUP98-KDM5A</i>   | BM <sup>b</sup>                                        | xAML-3_F823                |
| <b>Xenograft_B-ALL</b>                    |                      |                                                        |                            |
| xB-ALL-1                                  | <i>NUP98-KDM5A</i>   | BM <sup>b</sup>                                        | xB-ALL-1_C384              |
| xB-ALL-2                                  | <i>NUP98-KDM5A</i>   | FACS sorted CD19 <sup>+</sup> spleen cells             | xB-ALL-2_D918              |
| xB-ALL-3                                  | <i>NUP98-KDM5A</i>   | FACS sorted CD19 <sup>+</sup> spleen cells             | xB-ALL-3_D917              |
| xB-ALL-4                                  | <i>NUP98-KDM5A</i>   | FACS sorted CD19 <sup>+</sup> spleen cells             | xB-ALL-4_E755              |
| <b>CB-CD34<sup>+</sup> cells</b>          |                      |                                                        |                            |
| CB-CD34 <sup>+</sup> -1                   | none                 | MACS sorted CD34 <sup>+</sup> CB cells                 | CB-CD34 <sup>+</sup> -1    |
| CB-CD34 <sup>+</sup> -2                   | none                 | MACS sorted CD34 <sup>+</sup> CB cells                 | CB-CD34 <sup>+</sup> -2    |
| CB-CD34 <sup>+</sup> -3                   | none                 | MACS sorted CD34 <sup>+</sup> CB cells                 | CB-CD34 <sup>+</sup> -3    |
| CB-CD34 <sup>+</sup> -4                   | none                 | MACS sorted CD34 <sup>+</sup> CB cells                 | CB-CD34 <sup>+</sup> -4    |

<sup>a</sup>pAMKL-3D and pAMKL-3P, diagnostic and disease progression sample, respectively (Roussy et al, Genes Chromosomes Cancer, 2018). <sup>b</sup>Unsorted bone marrow (BM) cells. AMKL, acute megakaryoblastic leukemia; AML-O, acute myeloid leukemia others (non-AMKL); B-ALL, B-cell acute lymphoblastic leukemia; CB, cord blood; FACS and MACS, fluorescence and magnetic -activated cell sorting, respectively. N/A, not available.

**Table S6. List of 95 leukemia-related genes considered for calling variants from RNA sequencing data.**

|               |               |               |                |              |
|---------------|---------------|---------------|----------------|--------------|
| <i>ABL1</i>   | <i>DGKH</i>   | <i>IL7R</i>   | <i>NT5C2</i>   | <i>SH2B3</i> |
| <i>ABL2</i>   | <i>DNMT3A</i> | <i>JAK1</i>   | <i>NTRK3</i>   | <i>SMC1A</i> |
| <i>AKT3</i>   | <i>DYRK1A</i> | <i>JAK2</i>   | <i>NUP98</i>   | <i>SMC3</i>  |
| <i>ARID5B</i> | <i>EBF1</i>   | <i>JAK3</i>   | <i>PAG1</i>    | <i>SRSF2</i> |
| <i>ASXL1</i>  | <i>EP300</i>  | <i>KDM5A</i>  | <i>PAX5</i>    | <i>STAG2</i> |
| <i>ASXL2</i>  | <i>EPOR</i>   | <i>KDM6A</i>  | <i>PDGFRB</i>  | <i>TERT</i>  |
| <i>ATRX</i>   | <i>ETV6</i>   | <i>KIF2B</i>  | <i>PHF6</i>    | <i>TET2</i>  |
| <i>BCOR</i>   | <i>EZH2</i>   | <i>KIT</i>    | <i>PIP4K2A</i> | <i>TP53</i>  |
| <i>BMI1</i>   | <i>FBXW7</i>  | <i>KMT2A</i>  | <i>PRPF40B</i> | <i>TP63</i>  |
| <i>BRAF</i>   | <i>FLT3</i>   | <i>KMT2C</i>  | <i>PTEN</i>    | <i>TSLP</i>  |
| <i>CBL</i>    | <i>GATA1</i>  | <i>KMT2D</i>  | <i>PTK2B</i>   | <i>TYK2</i>  |
| <i>CBLB</i>   | <i>GATA2</i>  | <i>KMT2E</i>  | <i>PTPN11</i>  | <i>U2AF1</i> |
| <i>CDKN2A</i> | <i>GATA3</i>  | <i>KRAS</i>   | <i>PTPRJ</i>   | <i>U2AF2</i> |
| <i>CDKN2B</i> | <i>GNAS</i>   | <i>MAPK1</i>  | <i>RAD21</i>   | <i>WT1</i>   |
| <i>CEBPA</i>  | <i>IDH1</i>   | <i>MPL</i>    | <i>RB1</i>     | <i>ZRSR2</i> |
| <i>CEBPE</i>  | <i>IDH2</i>   | <i>MYC</i>    | <i>RUNX1</i>   |              |
| <i>CREBBP</i> | <i>IKZF1</i>  | <i>NF1</i>    | <i>SETD2</i>   |              |
| <i>CRLF2</i>  | <i>IKZF2</i>  | <i>NOTCH1</i> | <i>SF1</i>     |              |
| <i>CSF1R</i>  | <i>IKZF3</i>  | <i>NPM1</i>   | <i>SF3A1</i>   |              |
| <i>CUX1</i>   | <i>IL2RB</i>  | <i>NRAS</i>   | <i>SF3B1</i>   |              |

**Table S7. Primer list.**

| <b>RT-PCR assay</b>           | <b>Primer name</b> | <b>sequence</b>          | <b>Primer name</b> | <b>sequence</b>           | <b>Product size (bp)</b> |
|-------------------------------|--------------------|--------------------------|--------------------|---------------------------|--------------------------|
| <i>NUP98-KDM5A</i> breakpoint | NUP98-KDM5A_F2     | GTAACCAGCACCTGGGACTCTTGG | NUP98-KDM5A_R2     | GCCCCTGCTTCTTTGCACAGTTTAT | 740                      |
| <i>NEO1</i>                   | NEO1_F             | GGTTCTCCAGATCCTGAGGTG    | NEO1_R             | TGACCCACTTCACAGTTGGAG     | 413                      |
| <i>KDM5B</i>                  | KDM5B_F            | TGTCACAGTGAATATGGAGCTGAC | KDM5B_R            | CATCACTGGCATGTTGTTCAAATTC | 142                      |

Table S8. Expression values in FPKM (RNAseq) of genes encoding cell surface proteins that are differentially expressed by a least 10-fold in leukemic bone marrow cells derived from mouse xenograft models (xAMKL) and patients (pAMKL-1 and -2) presenting with NUP98-KDMSA (NSA) AMKL as compared to normal CB-CD34+ cells, and expressed at low levels ( $\leq 5$  FPKM) in CB-CD34+ cells.

| Gene Name | CB-CD34+ | NSA xAMKL- |        |         |         | NSA xAML-O- |       |       | xB-ALL- |       |       |       | NUP98r pAMKL |        |        |         | non-NUP98r pAMKL |        | NUP98r pAMKL | NUP98r pAMKL validation cohort |
|-----------|----------|------------|--------|---------|---------|-------------|-------|-------|---------|-------|-------|-------|--------------|--------|--------|---------|------------------|--------|--------------|--------------------------------|
|           | n=4      | 1          | 2      | 3       | 5       | 1           | 3     | 2     | 1       | 2     | 3     | 4     | 1            | 2      | 3D     | 3P      | 4                | 5      | 6            | n=7                            |
| RHAG      | 4.26     | 1164.20    | 430.40 | 362.93  | 370.12  | 0.00        | 0.00  | 0.00  | 0.00    | 0.20  | 0.15  | 1.03  | 266.93       | 341.55 | 334.04 | 784.33  | 511.54           | 218.75 | 1.34         | 376.88                         |
| MPIG6B    | 4.26     | 206.13     | 249.39 | 254.63  | 217.05  | 0.00        | 0.03  | 0.06  | 1.99    | 5.59  | 1.38  | 2.48  | 163.63       | 74.37  | 64.54  | 227.10  | 7.68             | 48.06  | 8.21         | 166.12                         |
| SELP      | 0.69     | 321.65     | 318.11 | 132.96  | 239.13  | 0.19        | 0.12  | 0.16  | 0.51    | 0.30  | 0.18  | 0.68  | 48.32        | 34.06  | 12.62  | 13.76   | 0.05             | 0.52   | 6.07         | 52.47                          |
| NEO1      | 0.33     | 125.39     | 63.43  | 106.11  | 116.35  | 0.39        | 1.51  | 0.72  | 0.20    | 0.23  | 0.26  | 1.01  | 144.67       | 47.66  | 34.73  | 92.21   | 268.10           | 8.38   | 0.21         | 36.44                          |
| CD96      | 1.83     | 123.50     | 125.65 | 95.56   | 107.14  | 0.05        | 0.08  | 0.04  | 25.05   | 7.36  | 9.58  | 41.56 | 127.71       | 49.80  | 18.06  | 29.17   | 129.02           | 54.96  | 112.91       | 38.81                          |
| LTK       | 1.00     | 105.21     | 150.96 | 53.61   | 104.74  | 16.49       | 20.17 | 8.95  | 13.46   | 5.73  | 9.80  | 26.21 | 162.38       | 21.93  | 3.09   | 7.18    | 16.31            | 5.84   | 1.81         | 57.77                          |
| GP9       | 2.40     | 111.32     | 108.81 | 100.07  | 107.56  | 0.15        | 0.04  | 0.11  | 0.08    | 0.13  | 0.62  | 0.36  | 49.23        | 26.87  | 10.02  | 24.77   | 11.06            | 113.09 | 4.02         | 27.31                          |
| KEL       | 2.64     | 67.09      | 56.27  | 54.81   | 67.15   | 0.22        | 0.03  | 0.09  | 0.21    | 0.14  | 0.46  | 0.88  | 88.88        | 52.73  | 59.79  | 113.44  | 1.52             | 33.88  | 0.49         | 65.96                          |
| EPOR      | 3.24     | 23.42      | 29.36  | 36.38   | 26.52   | 3.43        | 2.73  | 2.39  | 0.82    | 4.00  | 1.95  | 0.68  | 188.83       | 17.97  | 48.12  | 116.40  | 0.38             | 30.63  | 1.47         | 24.71                          |
| TRPM4     | 1.46     | 74.01      | 46.20  | 38.56   | 15.74   | 63.23       | 35.81 | 15.88 | 8.08    | 3.45  | 5.51  | 3.23  | 26.26        | 10.14  | 2.09   | 5.28    | 0.73             | 3.24   | 0.10         | 19.27                          |
| FRAS1     | 0.06     | 19.67      | 34.43  | 53.24   | 48.26   | 0.01        | 0.00  | 0.00  | 0.01    | 0.06  | 0.01  | 0.08  | 43.78        | 22.27  | 0.26   | 1.64    | 11.48            | 5.62   | 0.00         | 13.89                          |
| XK        | 1.75     | 36.26      | 27.25  | 21.91   | 44.67   | 0.00        | 0.04  | 0.04  | 0.00    | 0.03  | 0.01  | 0.05  | 30.94        | 42.11  | 25.14  | 36.84   | 26.72            | 20.34  | 3.38         | 33.99                          |
| SMIM1     | 2.39     | 22.74      | 20.23  | 13.28   | 25.38   | 0.16        | 0.16  | 0.63  | 0.31    | 0.10  | 0.11  | 0.11  | 42.29        | 39.63  | 28.02  | 23.02   | 6.12             | 16.72  | 1.13         | 10.50                          |
| PTGER3    | 0.52     | 24.75      | 14.43  | 32.23   | 58.59   | 0.09        | 0.13  | 0.20  | 0.03    | 0.00  | 0.00  | 0.20  | 39.28        | 7.88   | 13.72  | 40.36   | 0.00             | 19.10  | 0.01         | 18.91                          |
| PDZK1IP1  | 1.38     | 31.82      | 9.93   | 15.33   | 26.79   | 0.00        | 0.00  | 0.00  | 0.00    | 0.06  | 0.16  | 0.19  | 41.54        | 16.75  | 4.93   | 5.05    | 0.03             | 0.51   | 0.45         | 14.47                          |
| SLC13A3   | 0.08     | 25.14      | 20.99  | 33.68   | 27.06   | 0.05        | 0.03  | 0.01  | 0.04    | 0.03  | 0.04  | 0.41  | 13.50        | 6.19   | 3.91   | 10.35   | 0.26             | 5.53   | 0.00         | 10.05                          |
| PTCH1     | 0.41     | 7.43       | 11.51  | 35.80   | 11.82   | 0.02        | 0.06  | 0.31  | 18.73   | 16.82 | 8.45  | 5.26  | 19.14        | 13.98  | 6.47   | 4.43    | 9.81             | 3.66   | 0.06         | 7.66                           |
| KCNJ4     | 0.02     | 21.35      | 22.14  | 11.98   | 36.33   | 4.57        | 0.57  | 0.10  | 26.26   | 34.74 | 2.62  | 18.42 | 18.98        | 8.87   | 0.00   | 0.05    | 0.00             | 0.00   | 0.00         | 10.50                          |
| MFSD2B    | 1.51     | 20.75      | 13.76  | 8.69    | 10.01   | 0.09        | 0.02  | 0.03  | 0.04    | 0.10  | 0.09  | 0.08  | 22.12        | 19.95  | 19.96  | 34.35   | 1.79             | 26.39  | 1.25         | 11.27                          |
| TRHDE     | 0.00     | 21.63      | 8.22   | 7.05    | 15.74   | 0.00        | 0.00  | 0.01  | 0.00    | 0.00  | 0.00  | 0.01  | 12.92        | 33.97  | 5.19   | 13.79   | 0.00             | 0.00   | 0.00         | 6.16                           |
| PCDH9     | 1.05     | 24.04      | 13.68  | 10.02   | 3.93    | 0.00        | 0.17  | 0.01  | 11.83   | 21.44 | 63.49 | 38.88 | 14.81        | 6.67   | 5.88   | 0.88    | 1.50             | 1.69   | 0.04         | 20.40                          |
| AMHR2     | 0.81     | 17.01      | 13.28  | 13.03   | 19.87   | 0.00        | 0.00  | 0.00  | 0.03    | 0.00  | 0.01  | 0.13  | 7.66         | 7.66   | 3.28   | 10.19   | 0.03             | 5.33   | 0.14         | 2.70                           |
| NCAM1     | 0.52     | 0.00       | 3.24   | 0.32    | 0.07    | 109.70      | 85.47 | 32.71 | 0.00    | 0.05  | 0.01  | 0.00  | 1.04         | 0.50   | 1.04   | 0.16    | 652.11           | 2.29   | 0.03         | 0.24                           |
| ITGA2B    | 21.67    | 1328.46    | 944.06 | 1234.69 | 1214.23 | 0.43        | 1.23  | 1.23  | 0.12    | 0.51  | 0.48  | 2.23  | 567.02       | 266.15 | 264.60 | 2688.02 | 407.53           | 587.24 | 46.20        | 361.09                         |
| ITGB3     | 10.21    | 80.85      | 68.19  | 32.03   | 56.88   | 0.00        | 0.01  | 0.00  | 0.03    | 0.10  | 0.11  | 0.27  | 25.68        | 15.94  | 16.06  | 32.90   | 17.63            | 62.54  | 7.78         | 22.30                          |

NUP98-KDMSA (NSA) acute megakaryoblastic leukemia xenograft models (xAMKL-); NSA acute myeloid leukemia (AML)-monocytoid xenograft models (NSA xAML-O-); NSA B-cell acute lymphoblastic leukemia xenograft models (xB-ALL-); AMKL patient samples (pAMKL) with or without NUP98 rearrangements (NUP98r or non-NUP98r, respectively); pAMKL-1 and -2, NSA; pAMKL-3D and -3P, NUP98-BPTF diagnostic and disease progression samples; pAMKL-4, CBFA2T3-GUS2; pAMKL-5, RBM15-MKL1; pAML-6, NUP98-NSD1. NUP98r pAMKL validation cohort (de Rooij, J.D.E., *Nature Genetics*, 2017). Megakaryocyte lineage/AMKL markers used for diagnosis are indicated in blue.

Table S10. Hallmark Get Sets enrichment associated with proteins expressed at the cell surface of primary NUP98-BPTF AMKL PDX cells.

| GroupID    | Category           | Term  | Description                                | LogP     | Log(q-value) | InTerm | InList | Genes                                                                                                                                 | Symbols                                                                                                                                                                                                            |
|------------|--------------------|-------|--------------------------------------------|----------|--------------|--------|--------|---------------------------------------------------------------------------------------------------------------------------------------|--------------------------------------------------------------------------------------------------------------------------------------------------------------------------------------------------------------------|
| 1_Summary  | Hallmark Gene Sets | M5924 | HALLMARK MTORC1 SIGNALING                  | -12.2141 | -10.241      | 23/200 |        | 488,811,871,928,1595,1717,2023,2181,3309,3689,4074,5052,5478,6510,6513,6515,6533,7037,7167,7184,8140,9415,60481,6275,6576,10994,26355 | ATP2A2, CALR, SERPINH1, CD9, CYP51A1, DHCR7, ENO1, ACSL3, HSPA5, ITGB2, M6PR, PRD1, X1, PPIA, SLC1A5, SLC2A1, SLC2A3, SLC2A4, SLC6A6, TFR3, TPPI1, HSP90B1, SLC7A5, FADS2, ELOVL5, S100A4, SLC25A1, ILVBL, FAM162A |
| 1_Member   | Hallmark Gene Sets | M5924 | HALLMARK MTORC1 SIGNALING                  | -12.2141 | -10.241      | 23/200 |        | 488,811,871,928,1595,1717,2023,2181,3309,3689,4074,5052,5478,6510,6513,6515,6533,7037,7167,7184,8140,9415,60481                       | ATP2A2, CALR, SERPINH1, CD9, CYP51A1, DHCR7, ENO1, ACSL3, HSPA5, ITGB2, M6PR, PRD1, X1, PPIA, SLC1A5, SLC2A1, SLC2A3, SLC6A6, TFR3, TPPI1, HSP90B1, SLC7A5, FADS2, ELOVL5                                          |
| 1_Member   | Hallmark Gene Sets | M5891 | HALLMARK HYPOXIA                           | -2.62987 | -2.072       | 10/200 |        | 2023,3309,6275,6513,6515,6533,6576,7167,10994,26355                                                                                   | ENO1, HSPA5, S100A4, SLC2A1, SLC2A3, SLC6A6, SLC25A1, TPPI1, ILVBL, FAM162A                                                                                                                                        |
| 2_Summary  | Hallmark Gene Sets | M5936 | HALLMARK OXIDATIVE PHOSPHORYLATION         | -9.59234 | -7.920       | 20/200 |        | 22,292,481,498,506,529,1537,2110,2806,4259,4718,5,905,8884,10162,10935,23344,23788,55177,92840                                        | ABC87, SLC25A5, ATP181, ATP5F1A, ATP5F1B, ATP6V1E1, CY1C, ETFDH, GOT2, MGST3, N, DUF2C2, SLC25A3, SURF1, VDCA1, VDCA2, VDCA3, SLC25A11, SLC25A12, PRDX3, PHB2, C1, QBP, KAR5, PHB, PPIA, PSM1, PRDX4               |
| 2_Member   | Hallmark Gene Sets | M5936 | HALLMARK OXIDATIVE PHOSPHORYLATION         | -9.59234 | -7.920       | 20/200 |        | 22,292,481,498,506,529,1537,2110,2806,4259,4718,5,905,8884,10162,10935,23344,23788,55177,92840                                        | ABC87, SLC25A5, ATP181, ATP5F1A, ATP5F1B, ATP6V1E1, CY1C, ETFDH, GOT2, MGST3, N, DUF2C2, SLC25A3, SURF1, VDCA1, VDCA2, VDCA3, SLC25A11, SLC25A12, PRDX3, PHB2, C1, QBP, KAR5, PHB, PPIA, PSM1, PRDX4               |
| 2_Member   | Hallmark Gene Sets | M5926 | HALLMARK MYC TARGETS V1                    | -4.38202 | -3.488       | 13/200 |        | 708,1537,2806,3735,5245,5250,5478,5707,7416,7419,10549,10935,11331                                                                    | C1QBP, CY1C, GOT2, KAR5, PHB, SLC25A3, PPIA, PSM1, VDCA1, VDCA3, PRDX4, PRDX3, PHB2                                                                                                                                |
| 3_Summary  | Hallmark Gene Sets | M5905 | HALLMARK ADIPOGENESIS                      | -7.96471 | -6.469       | 18/200 |        | 348,483,948,1468,1537,1717,4259,5733,6510,6576,7,905,8884,10162,10935,23344,23788,55177,92840                                         | APOE, ATP183, CD36, SLC25A10, CY1C, DHCR7, MGST3, PTGER3, SLC1A5, SLC25A11, SLC25A12, PRDX3, PHB2                                                                                                                  |
| 3_Member   | Hallmark Gene Sets | M5905 | HALLMARK ADIPOGENESIS                      | -7.96471 | -6.469       | 18/200 |        | 348,483,948,1468,1537,1717,4259,5733,6510,6576,7,905,8884,10162,10935,23344,23788,55177,92840                                         | APOE, ATP183, CD36, SLC25A10, CY1C, DHCR7, MGST3, PTGER3, SLC1A5, SLC25A11, SLC25A12, PRDX3, PHB2                                                                                                                  |
| 4_Summary  | Hallmark Gene Sets | M5930 | HALLMARK EPITHELIAL MESENCHYMAL TRANSITION | -7.18999 | -5.819       | 17/200 |        | 290,355,813,871,960,1004,3673,3678,3685,3688,368,0,3693,3956,4853,5479,7040,7057                                                      | ANPEP, FAS, CALU, SERPINH1, CD44, CDH6, ITGA2, ITGA5, ITGAV, ITGB1, ITGB3, ITGB5, LGA1, LS1, NOTCH2, PPIB, TGFBI1, THBS1                                                                                           |
| 4_Member   | Hallmark Gene Sets | M5930 | HALLMARK EPITHELIAL MESENCHYMAL TRANSITION | -7.18999 | -5.819       | 17/200 |        | 290,355,813,871,960,1004,3673,3678,3685,3688,368,0,3693,3956,4853,5479,7040,7057                                                      | ANPEP, FAS, CALU, SERPINH1, CD44, CDH6, ITGA2, ITGA5, ITGAV, ITGB1, ITGB3, ITGB5, LGA1, LS1, NOTCH2, PPIB, TGFBI1, THBS1                                                                                           |
| 5_Summary  | Hallmark Gene Sets | M5950 | HALLMARK ALLOGRAFT REJECTION               | -5.03733 | -3.763       | 14/200 |        | 355,567,924,958,961,2149,2589,3133,3383,3683,368,9,4065,5788,7040                                                                     | FAS, B2M, CD7, CD40, CD47, F2R, GALNT1, HLA-E, ICAM1, ITGAL, ITGB2, LY75, PTPRC, TGFBI1                                                                                                                            |
| 5_Member   | Hallmark Gene Sets | M5950 | HALLMARK ALLOGRAFT REJECTION               | -5.03733 | -3.763       | 14/200 |        | 355,567,924,958,961,2149,2589,3133,3383,3683,368,9,4065,5788,7040                                                                     | FAS, B2M, CD7, CD40, CD47, F2R, GALNT1, HLA-E, ICAM1, ITGAL, ITGB2, LY75, PTPRC, TGFBI1                                                                                                                            |
| 6_Summary  | Hallmark Gene Sets | M5897 | HALLMARK IL6 JAK STAT3 SIGNALING           | -4.7593  | -3.564       | 9/87   |        | 355,928,948,952,960,3676,3690,5770,7040                                                                                               | FAS, CD9, CD36, CD38, CD44, ITGA4, ITGB3, PTPN11, TGFBI1                                                                                                                                                           |
| 6_Member   | Hallmark Gene Sets | M5897 | HALLMARK IL6 JAK STAT3 SIGNALING           | -4.7593  | -3.564       | 9/87   |        | 355,928,948,952,960,3676,3690,5770,7040                                                                                               | FAS, CD9, CD36, CD38, CD44, ITGA4, ITGB3, PTPN11, TGFBI1                                                                                                                                                           |
| 7_Summary  | Hallmark Gene Sets | M5892 | HALLMARK CHOLESTEROL HOMEOSTASIS           | -4.43082 | -3.488       | 8/74   |        | 214,552,928,1595,1717,2222,9415,50814                                                                                                 | ALCAM, AVPR1A, CD9, CYP51A1, DHCR7, FDF1, FADS2, NSDHL                                                                                                                                                             |
| 7_Member   | Hallmark Gene Sets | M5892 | HALLMARK CHOLESTEROL HOMEOSTASIS           | -4.43082 | -3.488       | 8/74   |        | 214,552,928,1595,1717,2222,9415,50814                                                                                                 | ALCAM, AVPR1A, CD9, CYP51A1, DHCR7, FDF1, FADS2, NSDHL                                                                                                                                                             |
| 8_Summary  | Hallmark Gene Sets | M5910 | HALLMARK PROTEIN SECRETION                 | -4.41492 | -3.488       | 9/96   |        | 102,476,3482,4074,9341,10067,10972,11079,81542                                                                                        | ADAM10, ATP1A1, IGFBP2, M6PR, VAMP3, SCAMP3, TMED10, RER1, TMX1                                                                                                                                                    |
| 8_Member   | Hallmark Gene Sets | M5910 | HALLMARK PROTEIN SECRETION                 | -4.41492 | -3.488       | 9/96   |        | 102,476,3482,4074,9341,10067,10972,11079,81542                                                                                        | ADAM10, ATP1A1, IGFBP2, M6PR, VAMP3, SCAMP3, TMED10, RER1, TMX1                                                                                                                                                    |
| 9_Summary  | Hallmark Gene Sets | M5947 | HALLMARK IL2 STATS SIGNALING               | -4.40458 | -3.488       | 13/199 |        | 214,659,960,975,3480,3482,3655,3685,6403,6510,6515,15,9144,253558                                                                     | ALCAM, B2M, CD44, CD81, IGFBP1, IGFBP2, ITGA6, ITGAV, SELL, SLC1A5, SLC2A3, SYNGR2, LCLAT1                                                                                                                         |
| 9_Member   | Hallmark Gene Sets | M5947 | HALLMARK IL2 STATS SIGNALING               | -4.40458 | -3.488       | 13/199 |        | 214,659,960,975,3480,3482,3655,3685,6403,6510,6515,15,9144,253558                                                                     | ALCAM, B2M, CD44, CD81, IGFBP1, IGFBP2, ITGA6, ITGAV, SELL, SLC1A5, SLC2A3, SYNGR2, LCLAT1                                                                                                                         |
| 10_Summary | Hallmark Gene Sets | M5934 | HALLMARK XENOBIOTIC METABOLISM             | -4.38202 | -3.488       | 13/200 |        | 348,355,488,948,1312,1969,2110,3735,6510,6533,10,653,10857,60481                                                                      | APOE, FAS, ATP2A2, CD36, COMT, EPHA2, ETFDH, KAR5, SLC1A5, SLC6A6, SPINT2, PGRMC1, ELOVL5                                                                                                                          |
| 10_Member  | Hallmark Gene Sets | M5934 | HALLMARK XENOBIOTIC METABOLISM             | -4.38202 | -3.488       | 13/200 |        | 348,355,488,948,1312,1969,2110,3735,6510,6533,10,653,10857,60481                                                                      | APOE, FAS, ATP2A2, CD36, COMT, EPHA2, ETFDH, KAR5, SLC1A5, SLC6A6, SPINT2, PGRMC1, ELOVL5                                                                                                                          |
| 11_Summary | Hallmark Gene Sets | M5937 | HALLMARK GLYCOLYSIS                        | -4.38202 | -3.488       | 13/200 |        | 960,1468,2023,2806,3309,5315,5478,7167,9123,10162,10935,23344,23788,55177,92840                                                       | CD44, SLC25A10, ENO1, GOT2, HSPA5, PKM, PPIA, TPPI1, SLC16A3, SLC25A13, FAM162A, NSDHL, CLN6                                                                                                                       |
| 11_Member  | Hallmark Gene Sets | M5937 | HALLMARK GLYCOLYSIS                        | -4.38202 | -3.488       | 13/200 |        | 960,1468,2023,2806,3309,5315,5478,7167,9123,10162,10935,23344,23788,55177,92840                                                       | CD44, SLC25A10, ENO1, GOT2, HSPA5, PKM, PPIA, TPPI1, SLC16A3, SLC25A13, FAM162A, NSDHL, CLN6                                                                                                                       |
| 12_Summary | Hallmark Gene Sets | M5935 | HALLMARK FATTY ACID METABOLISM             | -4.0604  | -3.201       | 11/158 |        | 60481,92840,213,5052,54982,347734                                                                                                     | CD36, ETFDH, ACSL4, HSP90A1, LIGALS1, ERP29, NSDHL, HSD17B11, ACSL5, ELOVL5, REEP6, ALB, PRDX1, CLN6, SLC35B2                                                                                                      |
| 12_Member  | Hallmark Gene Sets | M5935 | HALLMARK FATTY ACID METABOLISM             | -4.0604  | -3.201       | 11/158 |        | 60481,92840,213,5052,54982,347734                                                                                                     | CD36, ETFDH, ACSL4, HSP90A1, LIGALS1, ERP29, NSDHL, HSD17B11, ACSL5, ELOVL5, REEP6, ALB, PRDX1, CLN6, SLC35B2                                                                                                      |
| 12_Member  | Hallmark Gene Sets | M5949 | HALLMARK PEROXISOME                        | -3.9007  | -2.647       | 8/104  |        | 213,2182,5052,51170,51703,54982,60481,347734                                                                                          | ALB, ACSL4, PRDX1, HSD17B11, ACSL5, CLN6, ELOVL5, SLC35B2                                                                                                                                                          |
| 13_Summary | Hallmark Gene Sets | M5932 | HALLMARK INFLAMMATORY RESPONSE             | -3.76085 | -2.992       | 12/200 |        | 488,490,958,1604,2811,3383,3678,3690,3732,6541,578,131566                                                                             | ATP2A2, ATP2B1, CD40, CD55, GP1BA, ICAM1, ITGA5, ITGB3, CD82, SLC7A1, SCARF1, DCB1, D2                                                                                                                             |
| 13_Member  | Hallmark Gene Sets | M5932 | HALLMARK INFLAMMATORY RESPONSE             | -3.76085 | -2.992       | 12/200 |        | 488,490,958,1604,2811,3383,3678,3690,3732,6541,578,131566                                                                             | ATP2A2, ATP2B1, CD40, CD55, GP1BA, ICAM1, ITGA5, ITGB3, CD82, SLC7A1, SCARF1, DCB1, D2                                                                                                                             |
| 14_Summary | Hallmark Gene Sets | M5939 | HALLMARK P53 PATHWAY                       | -3.76085 | -2.992       | 12/200 |        | 355,975,1969,2149,3732,6275,6520,7040,9538,23654                                                                                      | FAS, CD81, EPHA2, F2R, CD82, S100A4, SLC3A2, TGFBI1, E124, PLXNB2, FAM162A, STEAP3                                                                                                                                 |
| 14_Member  | Hallmark Gene Sets | M5939 | HALLMARK P53 PATHWAY                       | -3.76085 | -2.992       | 12/200 |        | 355,975,1969,2149,3732,6275,6520,7040,9538,23654                                                                                      | FAS, CD81, EPHA2, F2R, CD82, S100A4, SLC3A2, TGFBI1, E124, PLXNB2, FAM162A, STEAP3                                                                                                                                 |
| 15_Summary | Hallmark Gene Sets | M5915 | HALLMARK APICAL JUNCTION                   | -3.76085 | -2.992       | 12/200 |        | 947,1004,3383,3384,3673,3688,5175,5788,5819,6810,9019,140885                                                                          | CD34, CDH6, ICAM1, ICAM2, ITGA2, ITGB1, PECAM1, PTPRC, NECTIN2, STX4, MPZL1, SIRPA                                                                                                                                 |
| 15_Member  | Hallmark Gene Sets | M5915 | HALLMARK APICAL JUNCTION                   | -3.76085 | -2.992       | 12/200 |        | 947,1004,3383,3384,3673,3688,5175,5788,5819,6810,9019,140885                                                                          | CD34, CDH6, ICAM1, ICAM2, ITGA2, ITGB1, PECAM1, PTPRC, NECTIN2, STX4, MPZL1, SIRPA                                                                                                                                 |
| 16_Summary | Hallmark Gene Sets | M5902 | HALLMARK APOPTOSIS                         | -3.34406 | -2.626       | 10/161 |        | 355,552,952,960,2149,2934,3148,3482,7417,10134                                                                                        | FAS, AVPR1A, CD38, CD44, F2R, GSN, HMGB2, IGFB2, VDCA2, BCPA31                                                                                                                                                     |
| 16_Member  | Hallmark Gene Sets | M5902 | HALLMARK APOPTOSIS                         | -3.34406 | -2.626       | 10/161 |        | 355,552,952,960,2149,2934,3148,3482,7417,10134                                                                                        | FAS, AVPR1A, CD38, CD44, F2R, GSN, HMGB2, IGFB2, VDCA2, BCPA31                                                                                                                                                     |
| 17_Summary | Hallmark Gene Sets | M5945 | HALLMARK HEME METABOLISM                   | -3.17598 | -2.525       | 11/200 |        | 682,2995,3321,3792,4259,6513,6521,7037,7779,2305                                                                                      | BSG, GYPC, IGSF3, KEL, MGST3, SLC2A1, SLC4A1, TFR3, SLC30A1, ENODD1, MBOAT2                                                                                                                                        |
| 17_Member  | Hallmark Gene Sets | M5945 | HALLMARK HEME METABOLISM                   | -3.17598 | -2.525       | 11/200 |        | 682,2995,3321,3792,4259,6513,6521,7037,7779,2305                                                                                      | BSG, GYPC, IGSF3, KEL, MGST3, SLC2A1, SLC4A1, TFR3, SLC30A1, ENODD1, MBOAT2                                                                                                                                        |
| 18_Summary | Hallmark Gene Sets | M5906 | HALLMARK ESTROGEN RESPONSE EARLY           | -3.17598 | -2.525       | 11/200 |        | 960,1717,2222,3480,6513,6566,8140,23052,23223,25,800,60481,499,928,2030,4057,5733                                                     | CD44, DHCR7, FDF1, IGF1R, SLC2A1, SLC16A1, SLC7A5, ENODD1, RRP12, SLC39A6, ELOVL5                                                                                                                                  |
| 18_Member  | Hallmark Gene Sets | M5906 | HALLMARK ESTROGEN RESPONSE EARLY           | -3.17598 | -2.525       | 11/200 |        | 960,1717,2222,3480,6513,6566,8140,23052,23223,25,800,60481                                                                            | CD44, DHCR7, FDF1, IGF1R, SLC2A1, SLC16A1, SLC7A5, ENODD1, RRP12, SLC39A6, ELOVL5                                                                                                                                  |
| 18_Member  | Hallmark Gene Sets | M5907 | HALLMARK ESTROGEN RESPONSE LATE            | -3.17598 | -2.525       | 11/200 |        | 493,928,960,1717,2030,2222,4057,5733,6566,8140,4081                                                                                   | ATP2B4, CD9, CD44, DHCR7, SLC29A1, FDF1, LTF, PTGER3, SLC16A1, SLC7A5, ELOVL5                                                                                                                                      |
| 19_Summary | Hallmark Gene Sets | M5922 | HALLMARK UNFOLDED PROTEIN RESPONSE         | -3.14931 | -2.519       | 8/113  |        | 811,3309,7184,8140,9114,10525,28972,58477                                                                                             | CALR, HSPA5, HSP90B1, SLC7A5, ATP6V0D1, HYOU1, SPC51, SRPRB                                                                                                                                                        |
| 19_Member  | Hallmark Gene Sets | M5922 | HALLMARK UNFOLDED PROTEIN RESPONSE         | -3.14931 | -2.519       | 8/113  |        | 811,3309,7184,8140,9114,10525,28972,58477                                                                                             | CALR, HSPA5, HSP90B1, SLC7A5, ATP6V0D1, HYOU1, SPC51, SRPRB                                                                                                                                                        |
| 20_Summary | Hallmark Gene Sets | M5942 | HALLMARK UV RESPONSE DN                    | -3.08279 | -2.471       | 9/144  |        | 490,493,3480,3690,4052,4363,4853,6541,8455                                                                                            | ATP2B1, ATP2B4, IGF1R, ITGB3, LTBP1, ABC11, NOTCH2, SLC7A1, ATRN                                                                                                                                                   |
| 20_Member  | Hallmark Gene Sets | M5942 | HALLMARK UV RESPONSE DN                    | -3.08279 | -2.471       | 9/144  |        | 490,493,3480,3690,4052,4363,4853,6541,8455                                                                                            | ATP2B1, ATP2B4, IGF1R, ITGB3, LTBP1, ABC11, NOTCH2, SLC7A1, ATRN                                                                                                                                                   |

**Figure S1**

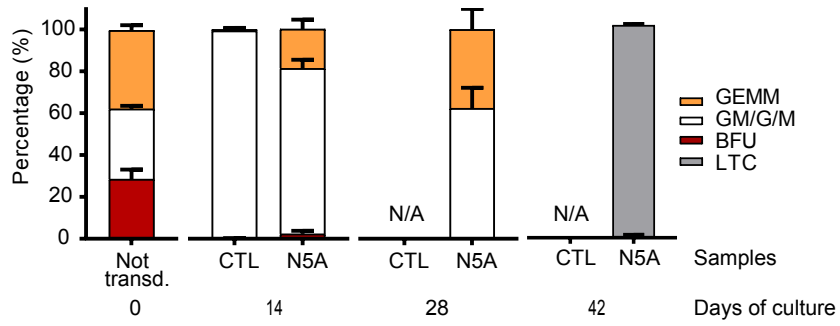

**Figure S1. Classification of clonogenic progenitors generated from NUP98-KDM5A cell lines at early time points of development.** CFU assays were performed with freshly isolated cord blood CD34<sup>+</sup> cells (not transduced cells, day 0, n=2) and control (CTL) or NUP98-KDM5A (N5A)-transduced cell lines on day 14 (n=6/condition), 28 (CTL, n=6; N5A, n=12) and 42 (CTL, n=2; N5A, n=10) of culture. At day 42, white colonies displaying undifferentiated morphology were classified as long-term colonies (LTC). Values are presented as mean percentage  $\pm$  SEM. N/A, progenitor activity exhausted for CTL cell lines.

**Figure S2**

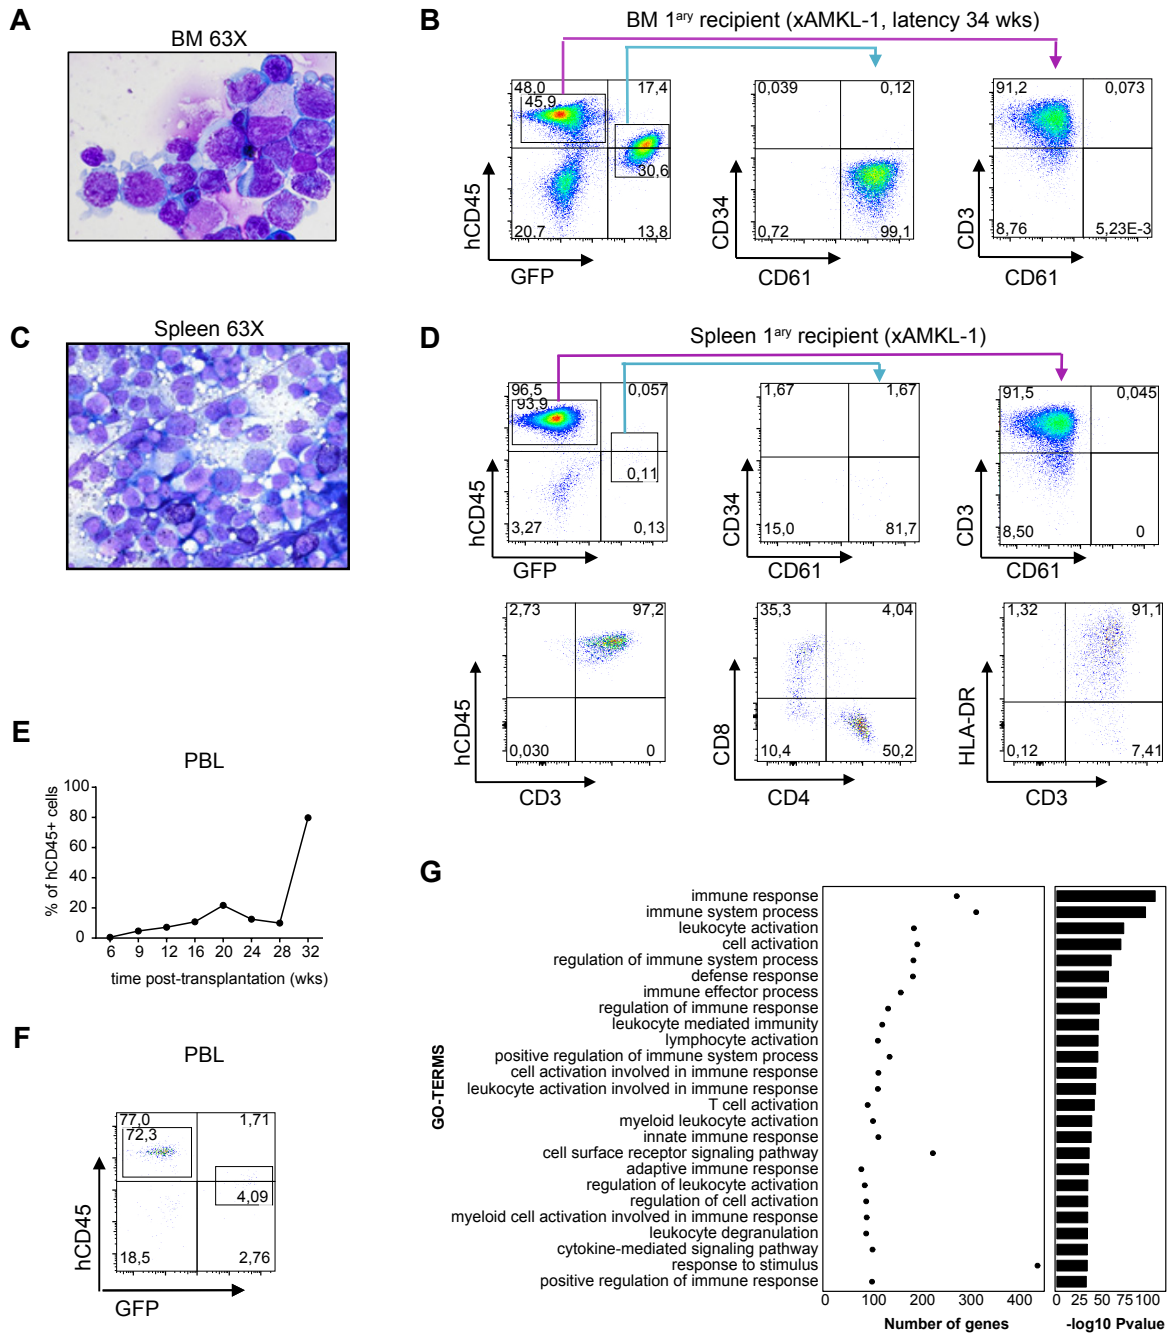

**Figure S2. Phenotypic characterisation of NUP98-KDM5A (N5A) acute megakaryoblastic leukemia (AMKL) xenograft model.** (A) Giemsa-stained cytopsin showing bone marrow infiltration with leukemic blasts in a N5A primary xenograft recipient (xAMKL-1) presenting advance signs of acute leukemia at 34 weeks (wks) post-transplantation. (B) Flow cytometry analyses showing high infiltration of hCD45<sup>low</sup>CD34<sup>+</sup>CD61<sup>+</sup> cells typical of AMKL, along with CD45<sup>hi</sup> CD3<sup>+</sup> activated T-cells, in the bone marrow (BM) of a N5A primary xenograft recipient (xAMKL-1). (C) Giemsa-stained cytopsin showing low infiltration of megakaryoblasts in the spleen. (D) Top panels, flow cytometry analyses revealing low infiltration of hCD45<sup>low</sup>CD34<sup>+</sup>CD61<sup>+</sup> megakaryoblasts in the spleen, along with CD45<sup>hi</sup> CD3<sup>+</sup> activated T-cells. Bottom panels, detection of T-cell surface biomarkers by flow cytometry in the hCD45<sup>+</sup>CD61<sup>+</sup>CD3<sup>+</sup> population isolated from the spleen of xAMKL-1 mouse. (E) Percentage of human hematopoietic (hCD45<sup>+</sup>) cells in the peripheral blood (PBL) of xAMKL-1 recipient, from week 6 post-transplantation up to sacrifice. (F) FACS profile showing human hematopoietic cells (hCD45<sup>+</sup>), expressing (or not) GFP, in the PBL of xAMKL-1 mouse. (G). Top 25 of significantly enriched Gene Ontology (GO)-terms for genes overexpressed in RNAseq from CD3<sup>+</sup> T-cells (n=2) compared to AMKL models are shown. The central dotmap shows the number of CD3-overexpressed genes enriched for each category, while the right panel show the  $-\log_{10}$  p-value of association.

**Figure S3**

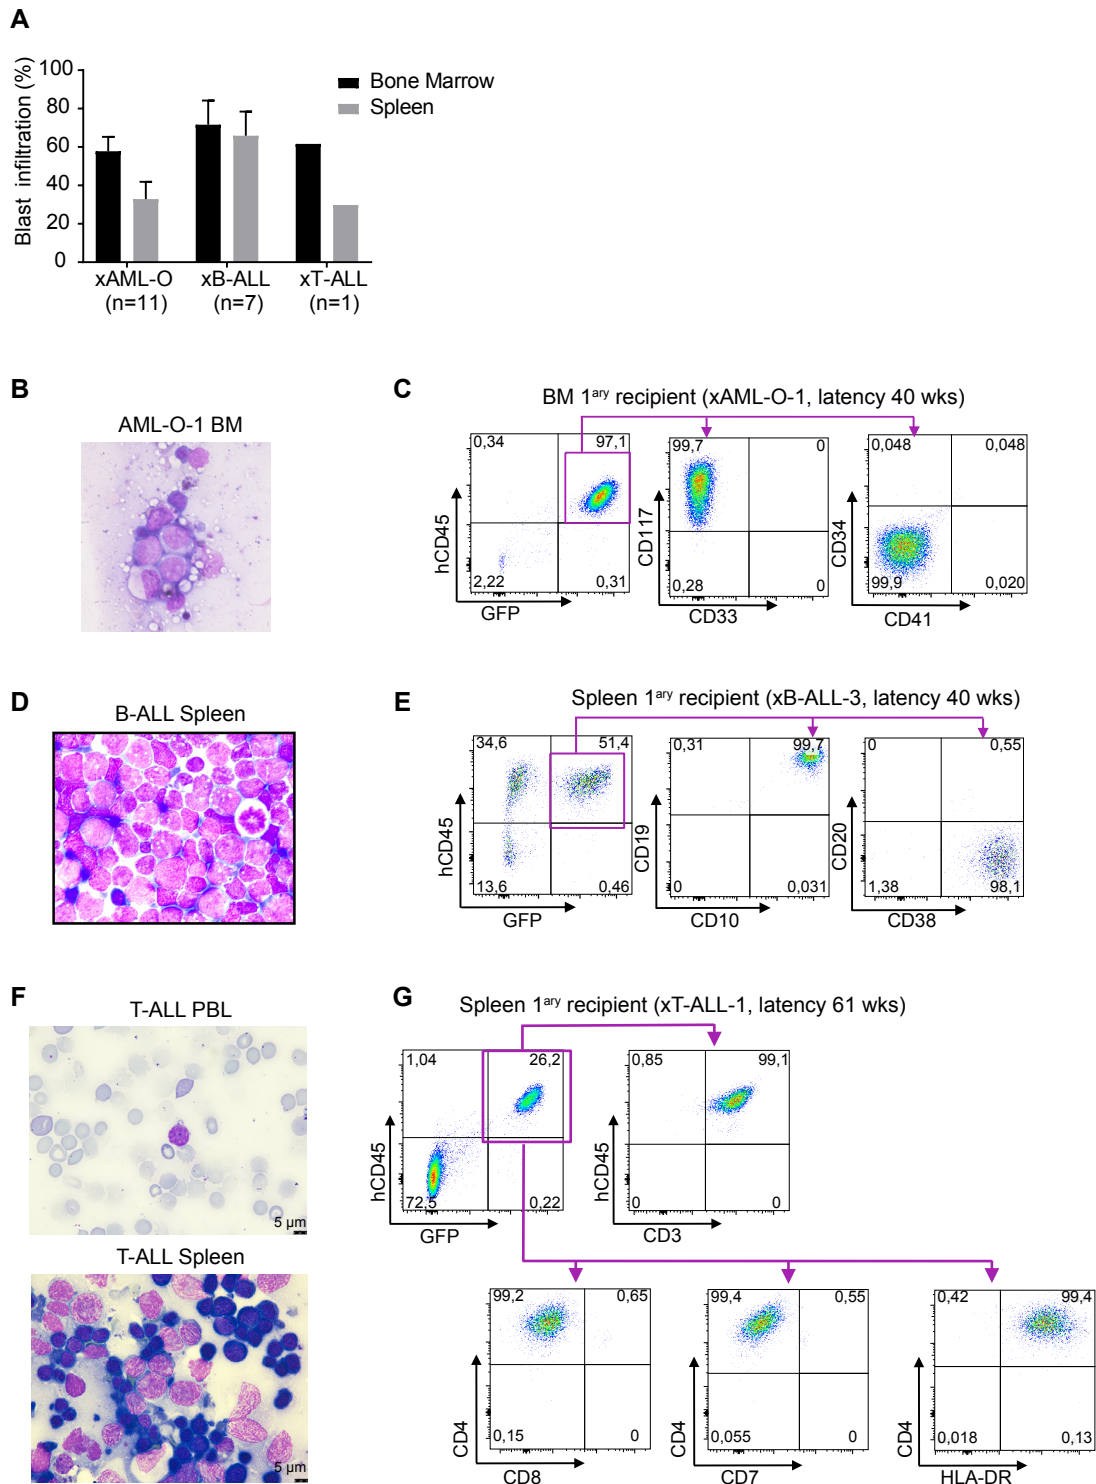

**Figure S3. Acute myeloid (AML) and lymphoblastic (ALL) leukemia in NUP98-KDM5A (N5A) xenograft models. (A)** Average blast infiltration percentage in bone marrow (BM) and spleen from primary xenograft recipients. xAML-O, other acute myeloid leukemia (non-AMKL), B-cell (xB-ALL) and T-cell (xT-ALL) acute lymphoblastic leukemia primary xenograft recipients. **(B)** AML-O in a N5A xenograft recipient characterized by the presence of myeloid blasts on Giemsa-stained BM cytopsin preparation **(C)** and expression of CD117 detected by flow cytometry. **(D)** B-ALL in a N5A xenograft recipient characterized by the presence of immature lymphocytes on Giemsa-stained spleen cytopsin preparation and **(E)** human GFP<sup>+</sup> cells expressing CD19, CD10, and CD38 detected by flow cytometry. Wks, weeks. Characterization of T-cell acute lymphoblastic leukemia xenograft model (xT-ALL-1) based on **(F)** Giemsa-stained spleen touch-prep showing leukemic blasts and on **(G)** detection of T-cell specific cell surface biomarkers by flow cytometry. Additional details for N5A leukemia in primary xenograft recipients are summarized in Table S3.



Figure S4

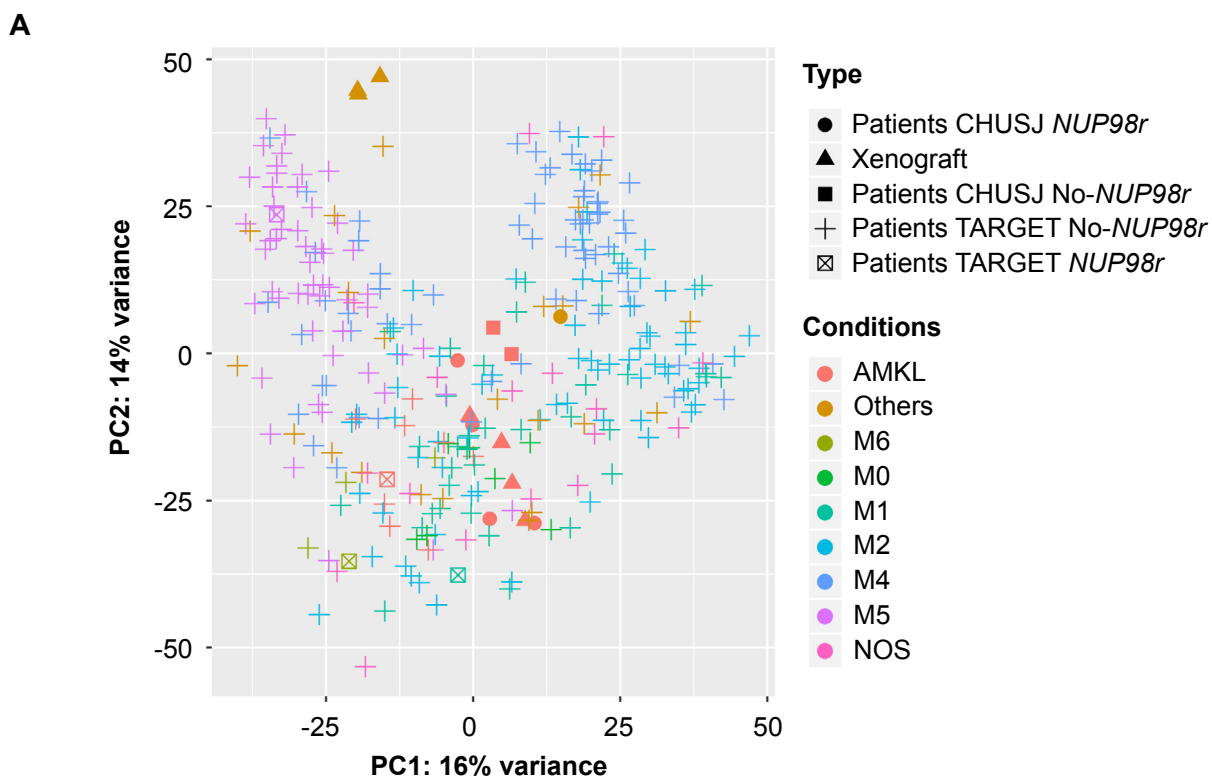

**B**

| Gene_Symbol          | xAMKL-1 | xAMKL-2 | xAMKL-3 | xAMKL-5 | xAML-O-1 | xAML-O-3 | xAML-O-2 | xB-ALL-1 | xB-ALL-3 | xB-ALL-2 | xB-ALL-4 | CB-CD34 <sup>+</sup> -1 | CB-CD34 <sup>+</sup> -2 | CB-CD34 <sup>+</sup> -3 | CB-CD34 <sup>+</sup> -4 |
|----------------------|---------|---------|---------|---------|----------|----------|----------|----------|----------|----------|----------|-------------------------|-------------------------|-------------------------|-------------------------|
| <i>PTPRC (CD45)</i>  | 54      | 67      | 61      | 61      | 104      | 121      | 136      | 11       | 40       | 45       | 18       | 157                     | 141                     | 157                     | 88                      |
| <i>LYZ</i>           | 89      | 1659    | 645     | 112     | 40524    | 33607    | 38441    | 10       | 11       | 7        | 9        | 55                      | 18                      | 1140                    | 300                     |
| <i>CD68</i>          | 61      | 109     | 115     | 64      | 283      | 285      | 504      | 12       | 17       | 30       | 8        | 66                      | 181                     | 6                       | 8                       |
| <i>CD33</i>          | 18      | 25      | 44      | 15      | 109      | 95       | 91       | 2        | 6        | 0        | 0        | 22                      | 25                      | 18                      | 43                      |
| <i>ITGAM (CD11b)</i> | 1       | 6       | 8       | 2       | 84       | 73       | 53       | 2        | 5        | 1        | 5        | 13                      | 14                      | 3                       | 8                       |
| <i>FUT4 (CD15)</i>   | 5       | 6       | 9       | 5       | 37       | 65       | 76       | 7        | 5        | 5        | 7        | 7                       | 7                       | 6                       | 9                       |
| <i>CD36</i>          | 14      | 8       | 3       | 15      | 80       | 104      | 66       | 0        | 0        | 0        | 0        | 15                      | 12                      | 12                      | 7                       |
| <i>ANPEP (CD13)</i>  | 1       | 1       | 2       | 1       | 1        | 2        | 28       | 2        | 0        | 5        | 1        | 39                      | 110                     | 21                      | 38                      |
| <i>CD14</i>          | 0       | 1       | 1       | 0       | 8        | 6        | 6        | 0        | 0        | 0        | 0        | 6                       | 157                     | 1                       | 1                       |
| <i>CD34</i>          | 1       | 0       | 1       | 0       | 1        | 0        | 0        | 143      | 108      | 173      | 22       | 156                     | 91                      | 92                      | 136                     |
| <i>MPO</i>           | 1       | 94      | 16      | 0       | 569      | 8        | 1446     | 212      | 5        | 2        | 276      | 52                      | 32                      | 754                     | 298                     |
| <i>KIT (CD117)</i>   | 1       | 2       | 14      | 1       | 66       | 26       | 9        | 1        | 0        | 0        | 0        | 32                      | 29                      | 92                      | 35                      |
| <i>TFRC (CD71)</i>   | 60      | 87      | 100     | 83      | 32       | 47       | 87       | 34       | 23       | 20       | 25       | 122                     | 105                     | 196                     | 94                      |

**Figure S4. Overexpression of NUP98-KDM5A fusion in CB-CD34<sup>+</sup> cells induces acute monocytic leukemia and multilineage leukemia subtypes in xenograft models.** (A) Principal component analysis showing the expression signatures of acute megakaryoblastic leukemia (AMKL) or AML-others xenografts (xAML-O) clustering with AMKL or acute monocytic leukemia profiles derived from pediatric patients, respectively. Top 500 genes as measured by variance were used to calculate the principal components. (B) Heatmap illustrating RNAseq gene expression (FPKM) of selected myeloid markers in leukemic cells derived from NUP98-KDM5A xenograft models compared to normal cord blood cells (CB-CD34<sup>+</sup>, n=4), suggesting that a subset of xAML-O are distinct and expressing monocyte markers. xAMKL or xB-ALL, acute megakaryoblastic leukemia or B-cell acute lymphoblastic leukemia xenograft, respectively.

Figure S5

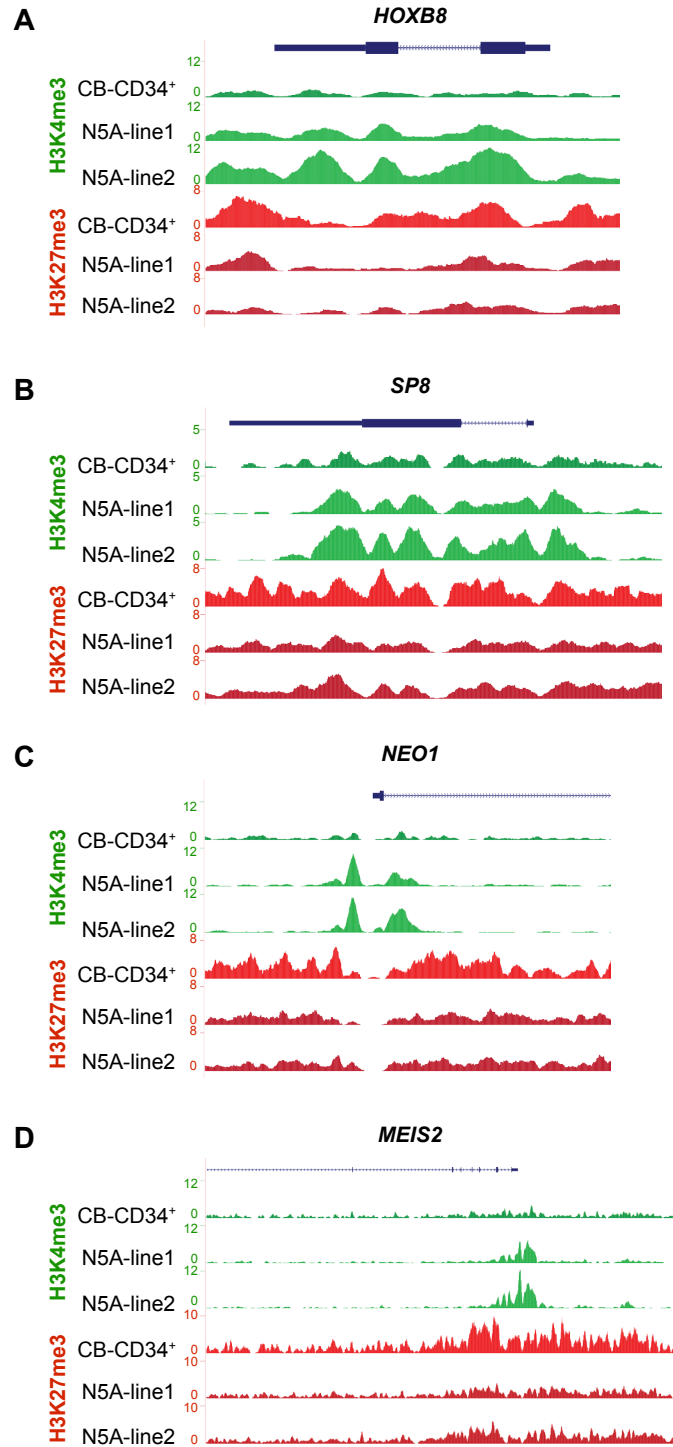

**Figure S5. Enrichment of H3K4me3 and H3K27me3 histone modifications along selected loci.** (A-D) Enrichment of H3K4me3 and H3K27me3 histone modifications along selected loci, as determined using ChIP-seq and chromatin extract from NUP98-KDM5A (N5A) overexpressing cell lines (n=2) and normal cord blood CD34<sup>+</sup> (CB-CD34<sup>+</sup>) cells. The selected genes are upregulated in N5A acute megakaryoblastic leukemia xenograft models compared to CB-CD34<sup>+</sup> cells. Images adapted from UCSC genome browser (<http://genome.ucsc.edu>).

Figure S6

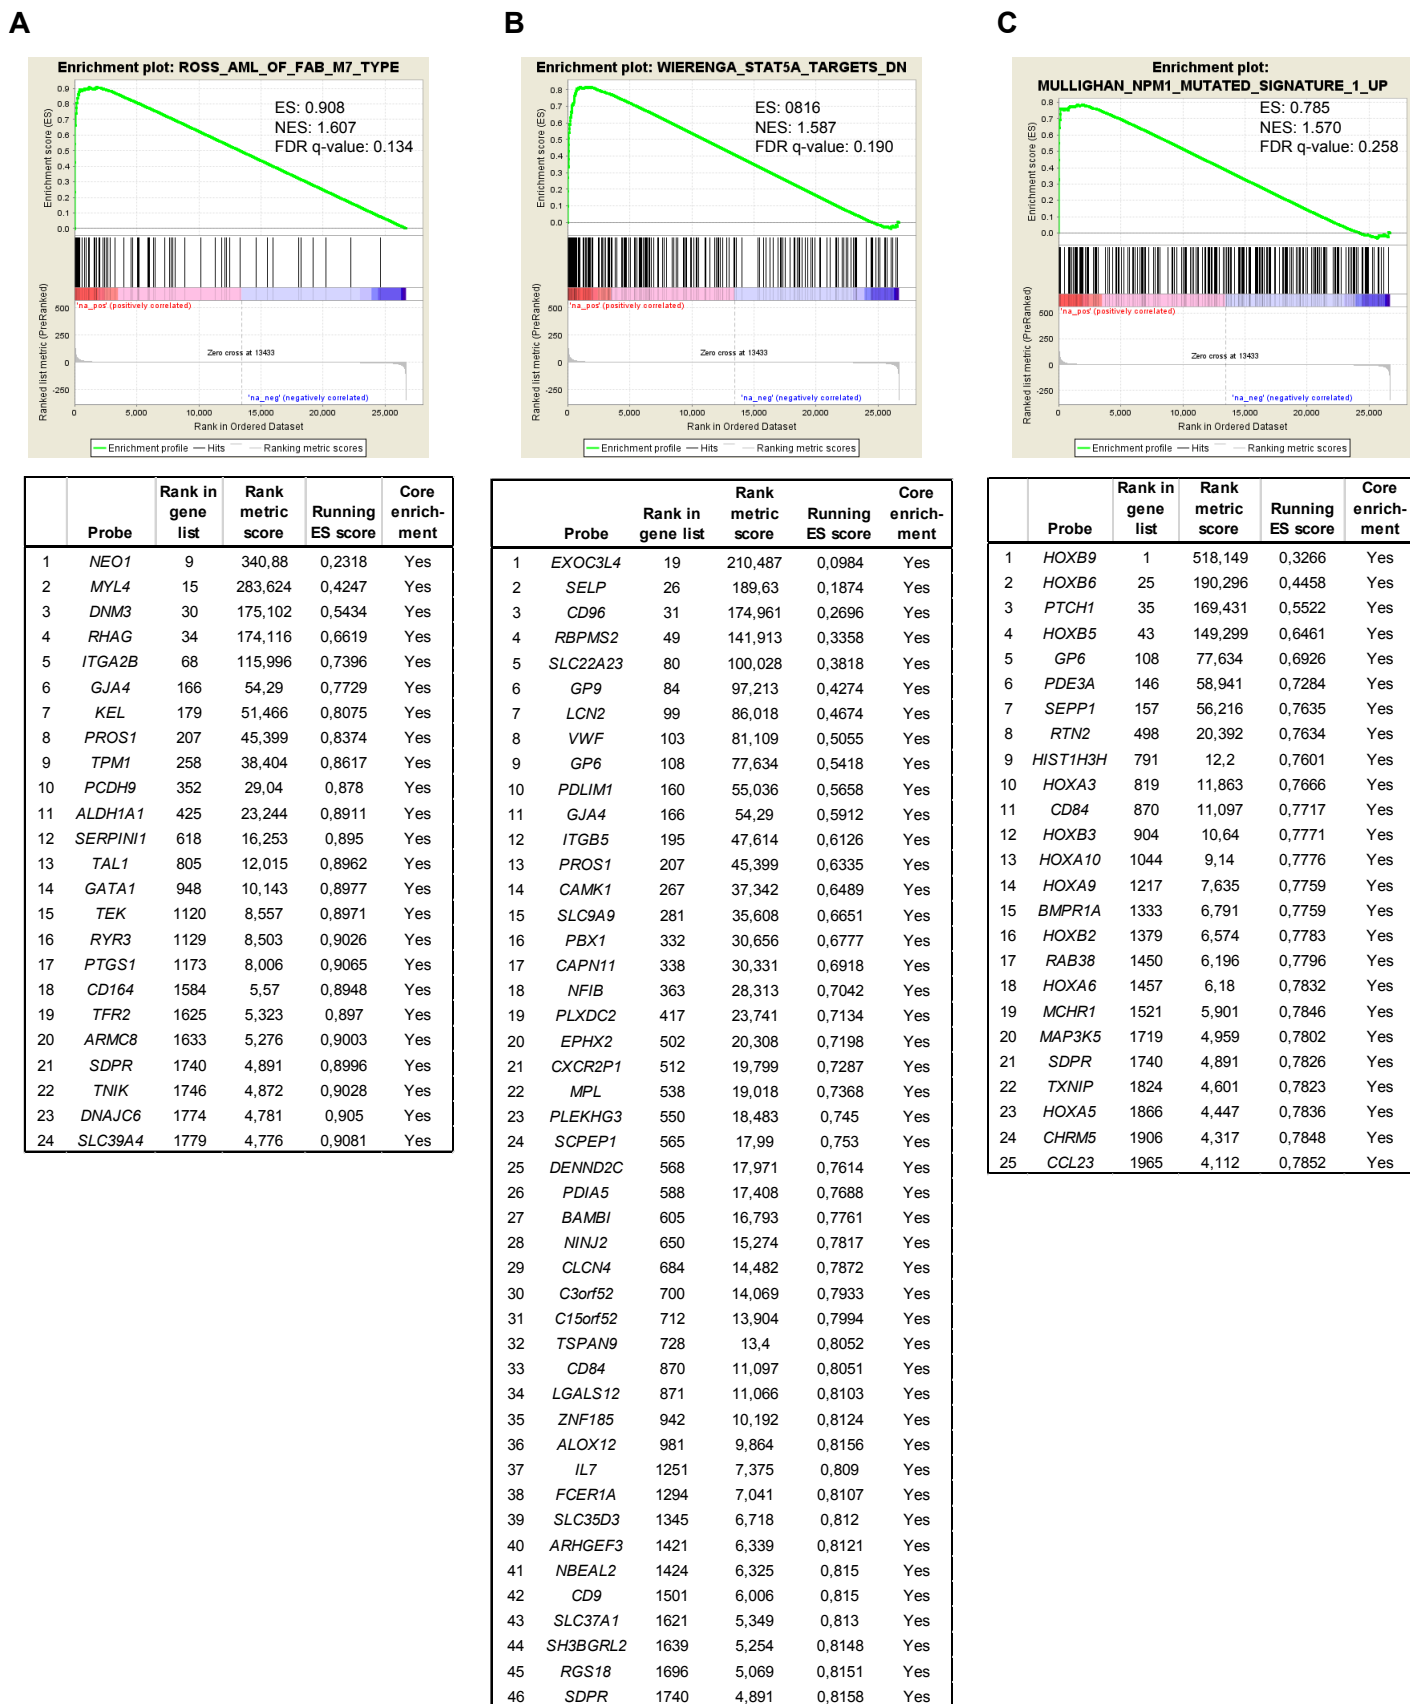

Figure S6. Gene set enrichment analysis (GSEA) of NUP98-KDM5A acute megakaryoblastic leukemia (AMKL) expression signature. (A-C) Enrichment plots for selected gene sets showing significant correlation with genes upregulated in NUP98-KDM5A AMKL patients and xenograft models compared to cord blood CD34<sup>+</sup> cells. Genes in the leading edge subsets are listed below enrichment plots.

Figure S7

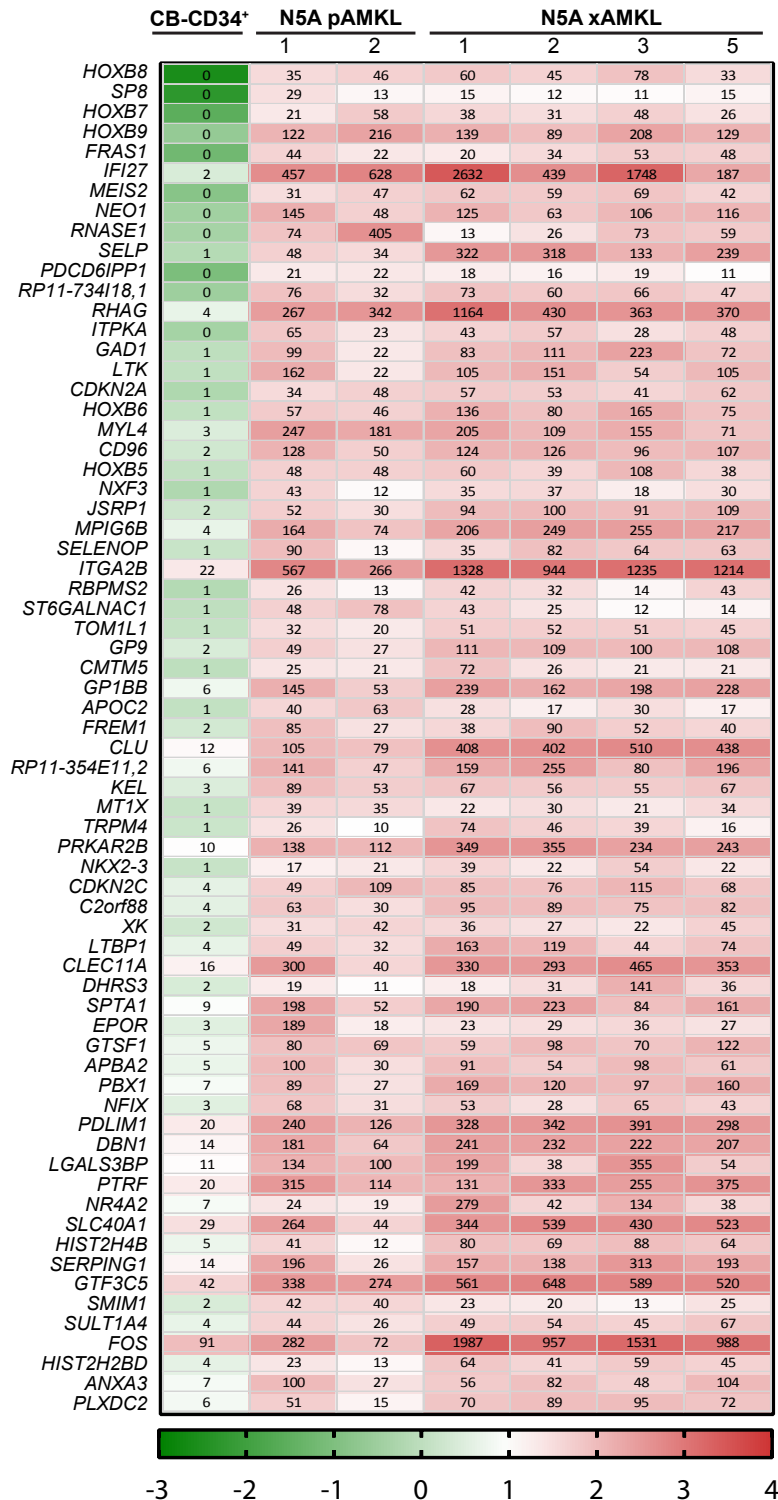

Figure S7. Genes differentially expressed by at least tenfold in a sampling of bone marrow cells derived from 2 patients and 4 xenograft models presenting NUP98-KDM5A (N5A) AMKL, as compared to normal cord blood CD34<sup>+</sup> cells. Genes with expression values of 0 FPKM for all samples were discarded. Genes with expression values of  $\geq 10$  FPKM for all N5A AMKL samples and fold changes  $\geq 10$  compared to CB-CD34<sup>+</sup> samples are displayed. CB-CD34<sup>+</sup>, cord blood CD34<sup>+</sup> cells. FPKM values are represented by a logarithmic color scale ( $\text{Log}_{10}$ ).
